# Supplementary material for: Development of thiacrown ligands for encapsulation of mercury-197m/g into radiopharmaceuticals
Source: Royal Society of Chemistry journal article supplement (doi:10.1039/d4dt02427c), 2024-01-01
Supplement: d4dt02427c1.pdf [file d4dt02427c1.pdf]

**Supporting Information for:**

**Development of Thiacrown Ligands for Encapsulation of Mercury-197m/g into Radiopharmaceuticals**

Parmissa Randhawa<sup>1,2</sup>, Cailum M.K. Stienstra<sup>2</sup>, Shaohuang Chen<sup>1,2</sup>, Yang Gao<sup>3,4</sup>, Georg Schreckenbach<sup>3</sup>, Valery Radchenko<sup>2,5</sup> and Caterina F. Ramogida<sup>1,2\*</sup>

<sup>1</sup> Department of Chemistry, Simon Fraser University, Canada, <sup>2</sup> Life Sciences Division, TRIUMF, Canada, <sup>3</sup> Department of Chemistry, University of Manitoba, Canada, <sup>4</sup> Institute of Fundamental and Frontier Sciences, University of Electronic Science and Technology of China, China, <sup>5</sup> Department of Chemistry, University of British Columbia, Canada

\*Correspondence: [cfr@sfu.ca](mailto:cfr@sfu.ca)

**Contents**

|                                          |     |
|------------------------------------------|-----|
| <b>NMR Characterization</b> .....        | S2  |
| <b>Mass Spectrometry</b> .....           | S25 |
| <b>Density Functional Theory</b> .....   | S26 |
| <b>Radiolabeling and Stability</b> ..... | S29 |
| <b>References</b> .....                  | S32 |

## NMR Characterization

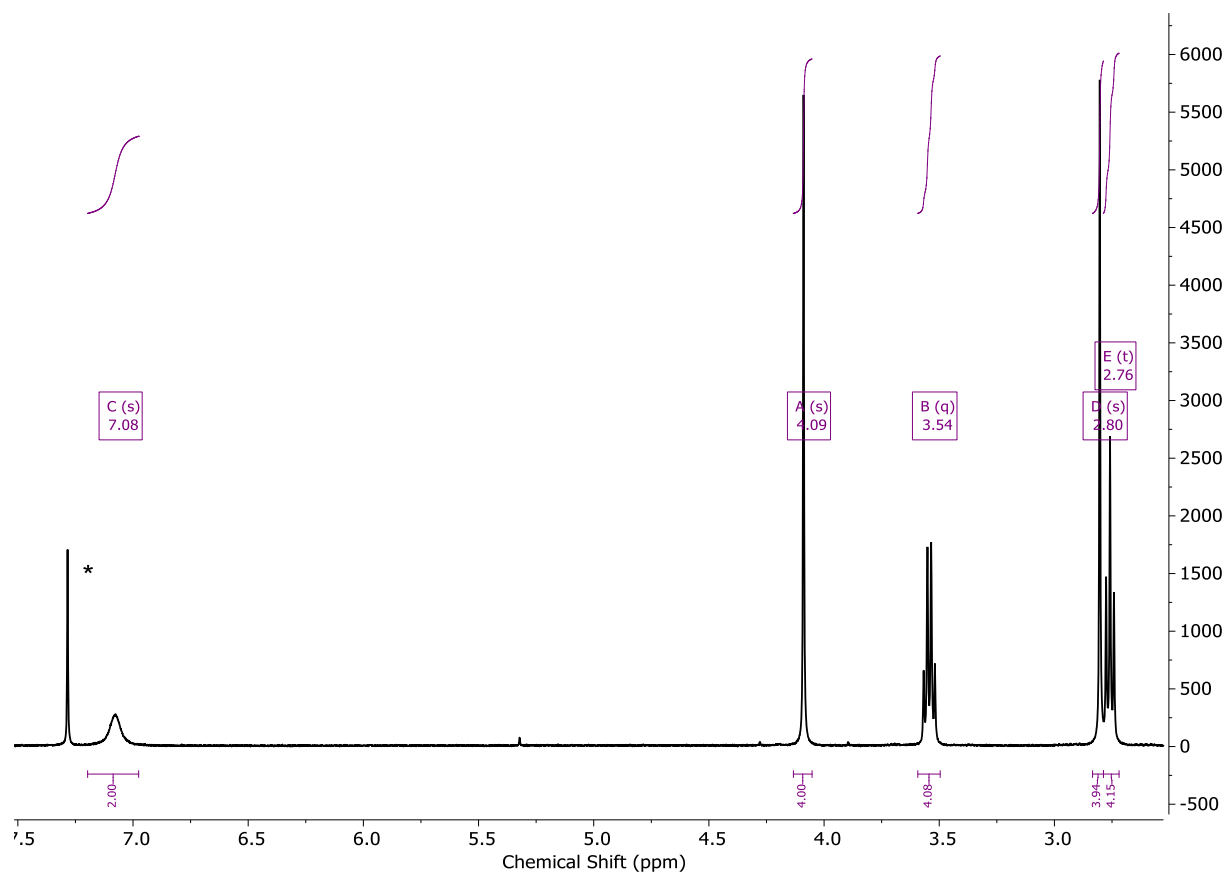

**Figure S1.** <sup>1</sup>H NMR (400 MHz, CDCl<sub>3</sub>\*, 25 °C): compound 1.

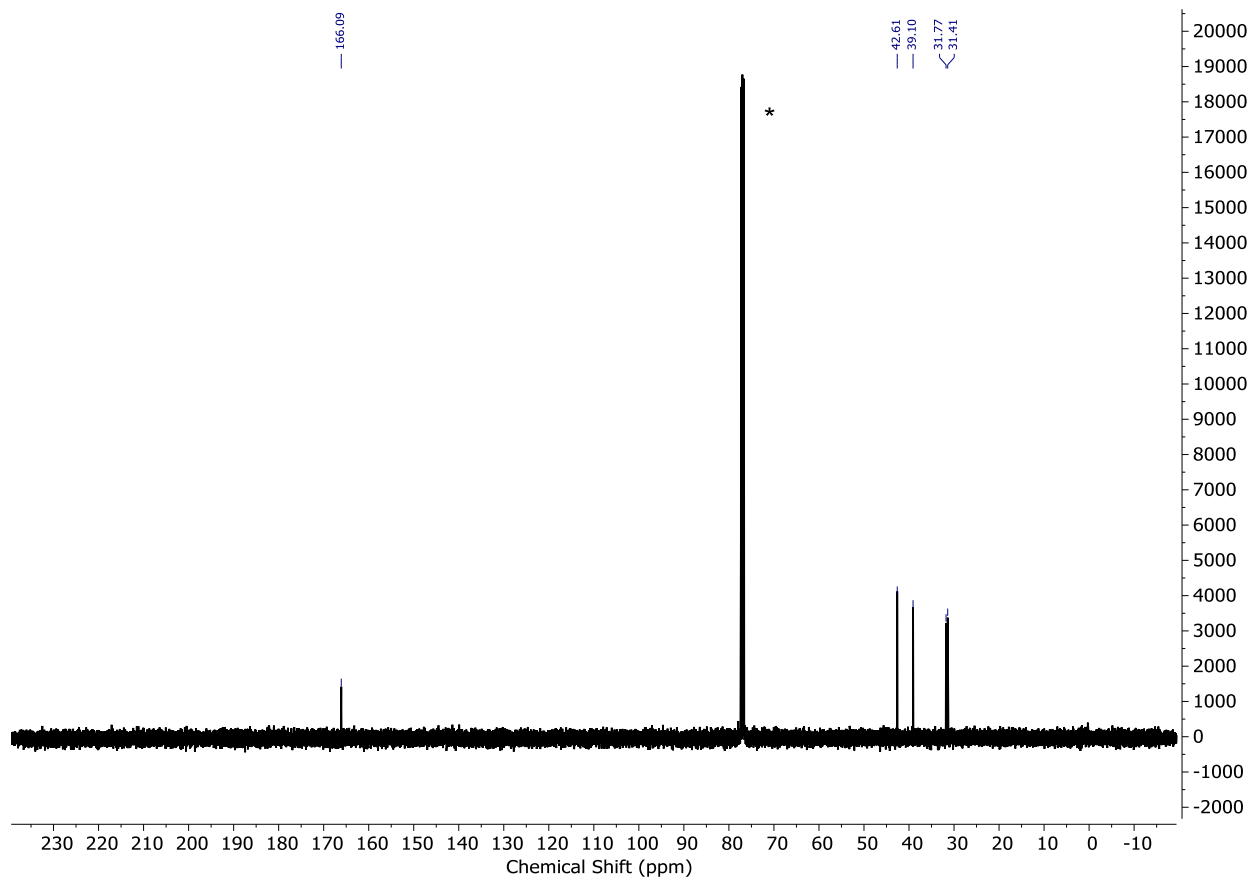

**Figure S2.** <sup>1</sup>H NMR (400 MHz, CDCl<sub>3</sub>\*, 25 °C): compound **1**.

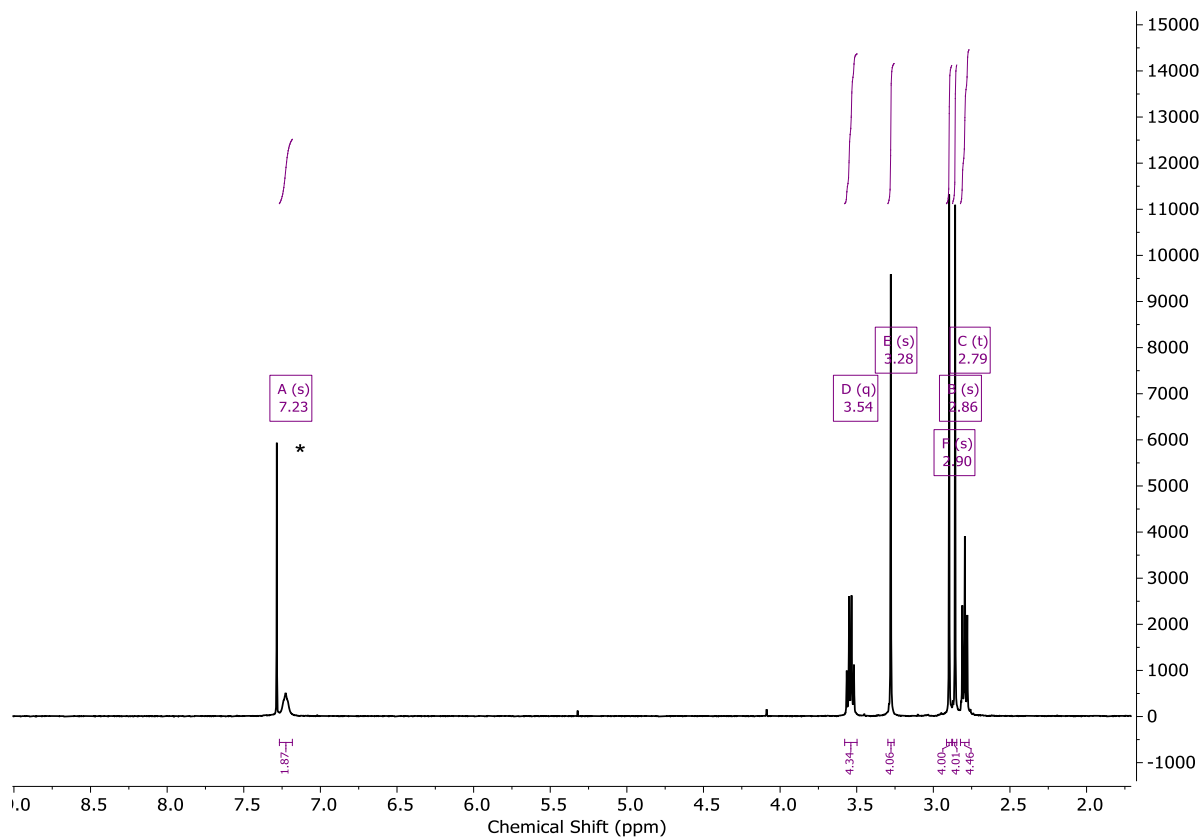

Figure S3. <sup>1</sup>H NMR (400 MHz, CDCl<sub>3</sub>\*, 25 °C): compound 2.

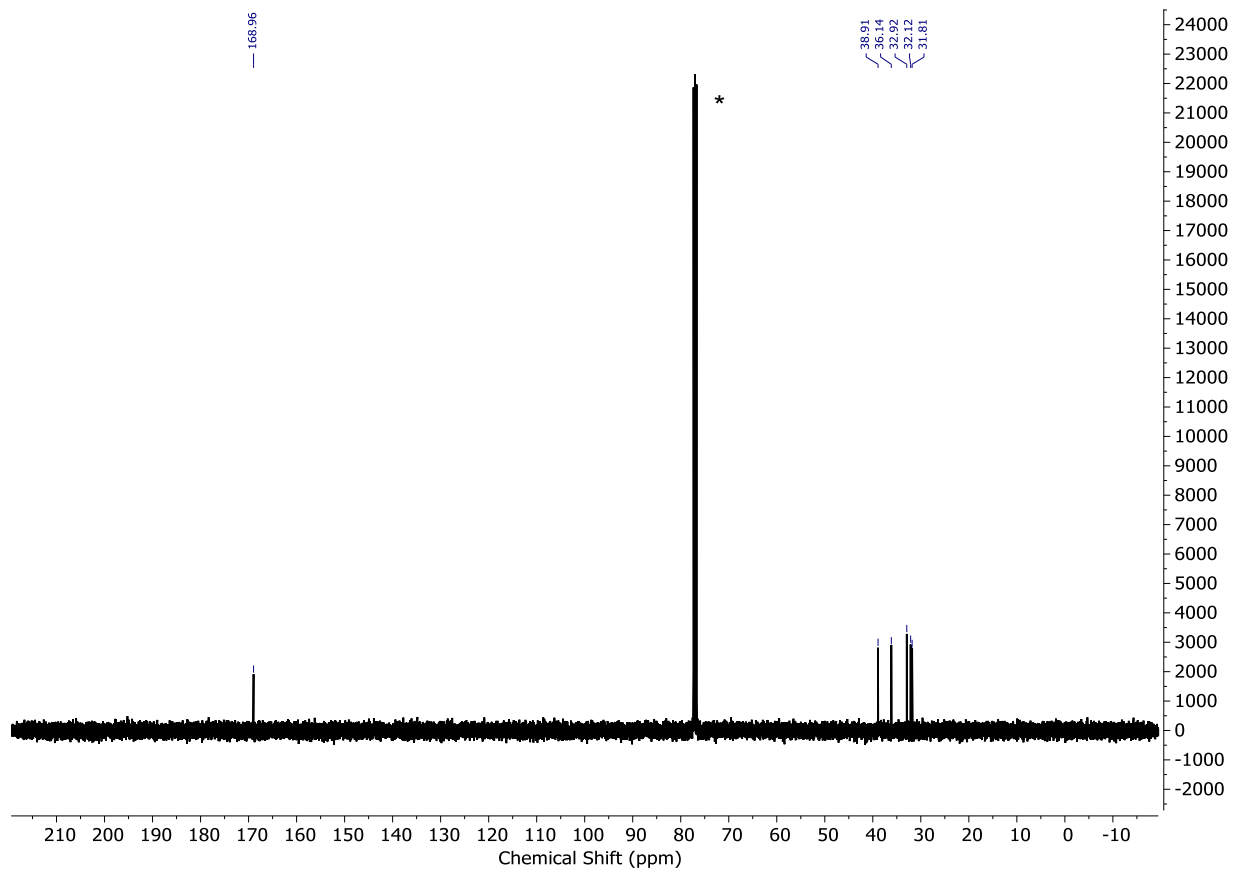

**Figure S4.**  $^{13}\text{C}\{^1\text{H}\}$  NMR (101 MHz,  $\text{CDCl}_3^*$ , 25 °C): compound 2.

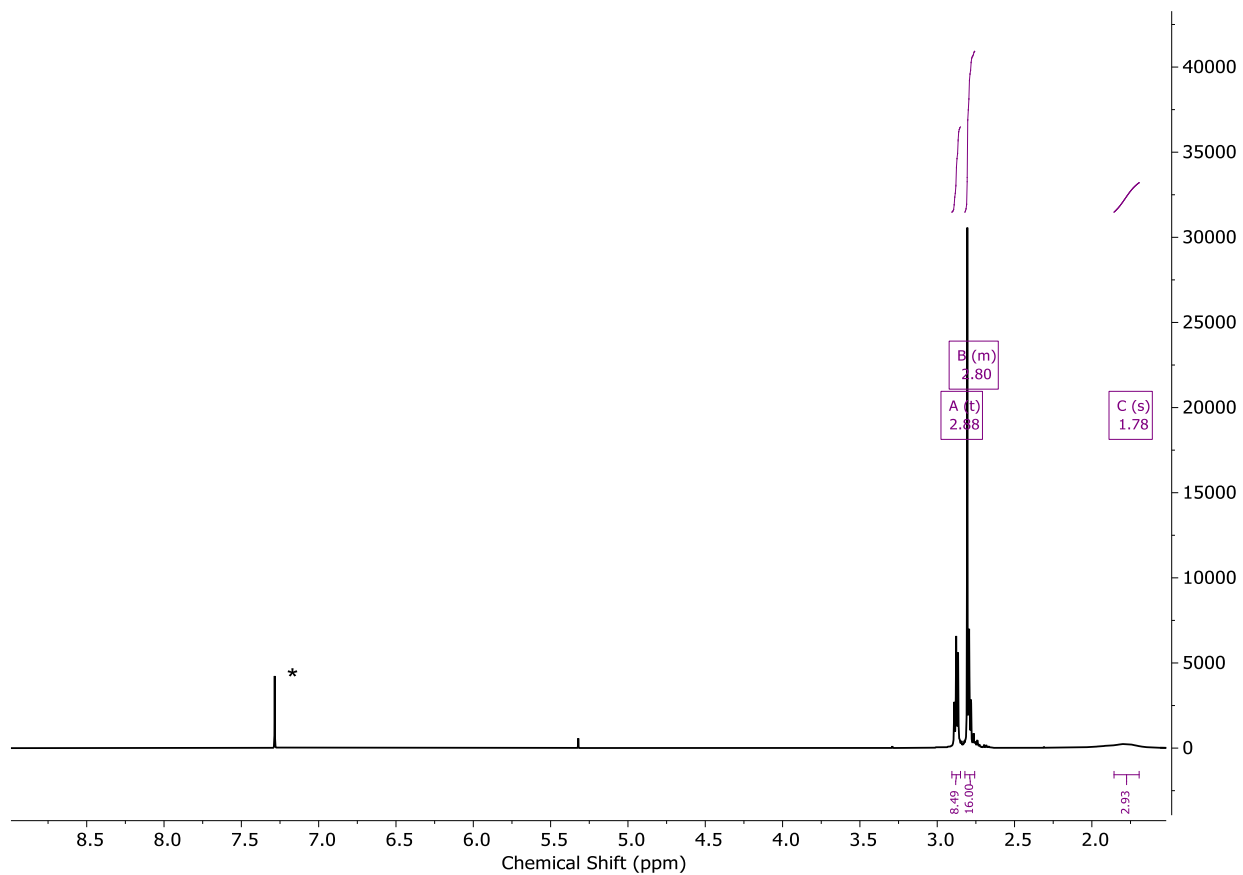

**Figure S5.** <sup>1</sup>H NMR (400 MHz, CDCl<sub>3</sub>\*, 25 °C): compound **3**.

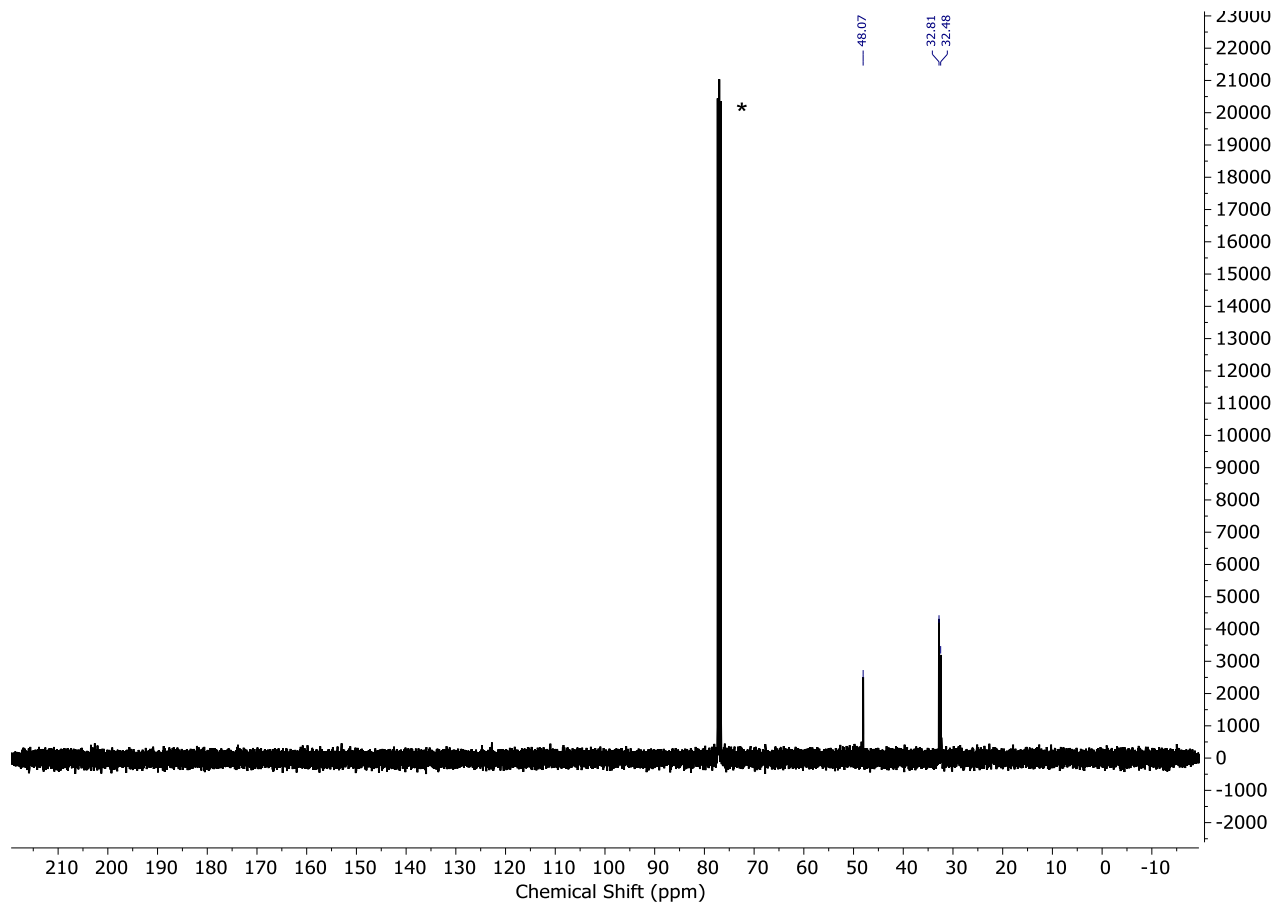

**Figure S6.**  $^{13}\text{C}\{^1\text{H}\}$  NMR (101 MHz,  $\text{CDCl}_3^*$ , 25 °C): compound **3**.

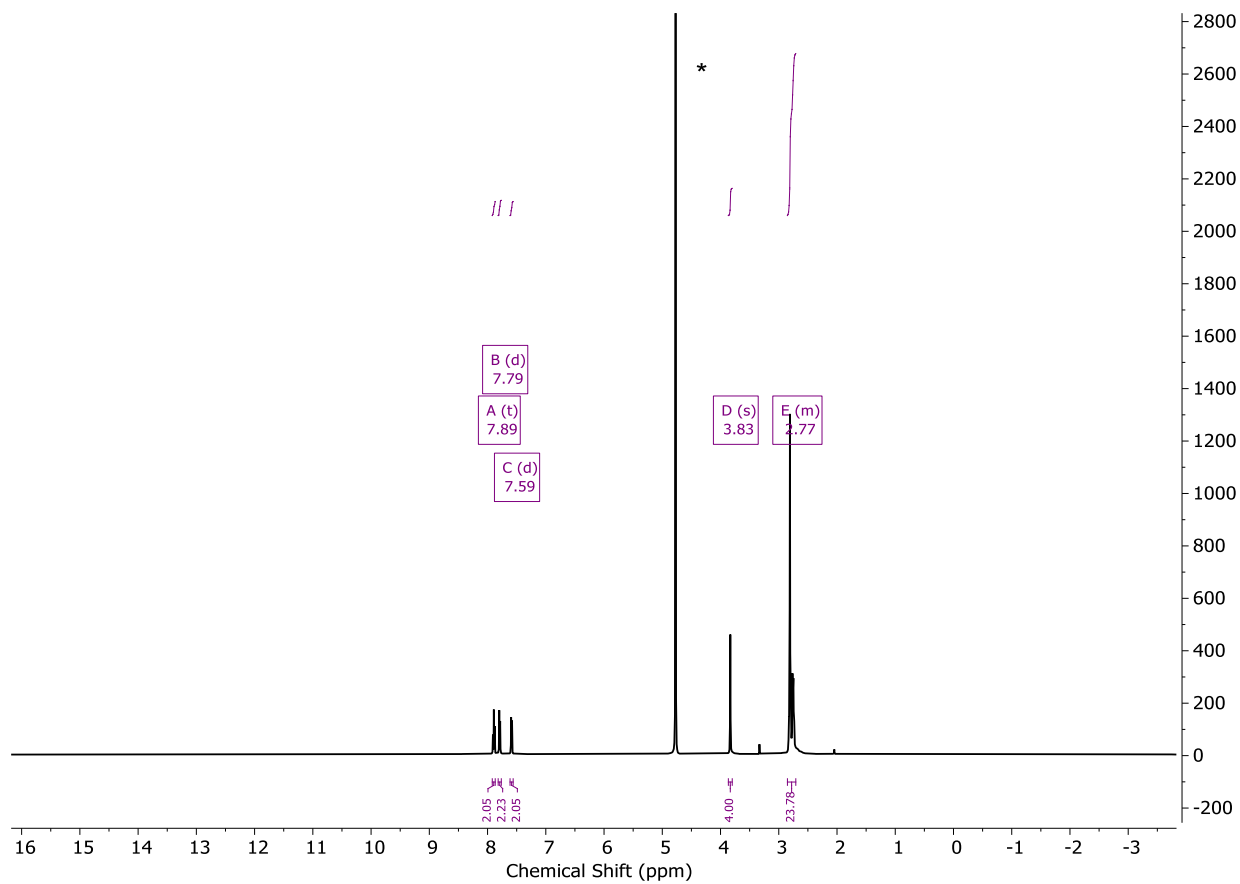

**Figure S7.**  $^1\text{H}$  NMR (500 MHz,  $\text{D}_2\text{O}^*$ , 25  $^\circ\text{C}$ ):  $\text{N}_2\text{S}_4\text{-H}_2\text{Pa}$ .



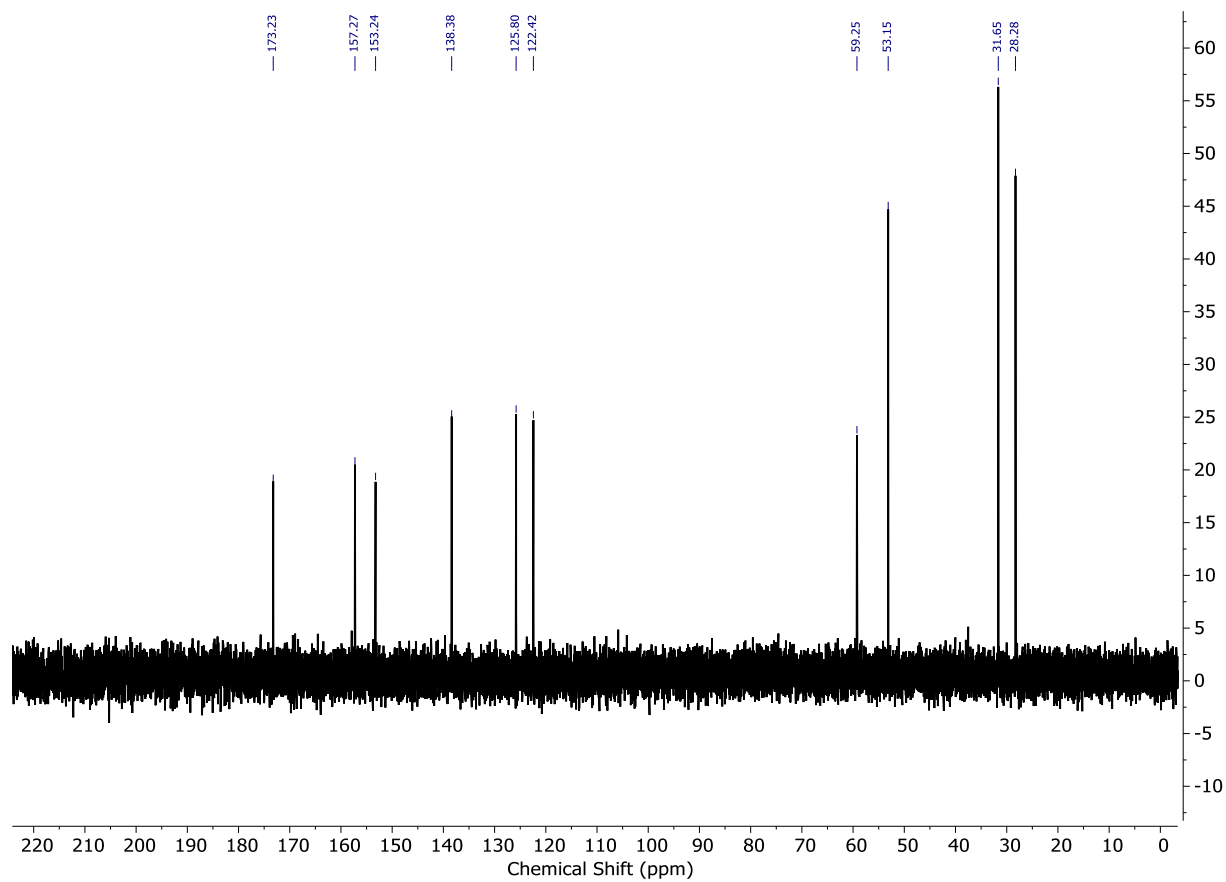

**Figure S8.**  $^{13}\text{C}\{^1\text{H}\}$  NMR (126 MHz,  $\text{D}_2\text{O}$ , 25 °C):  $\text{N}_2\text{S}_4\text{-H}_2\text{Pa}$ .

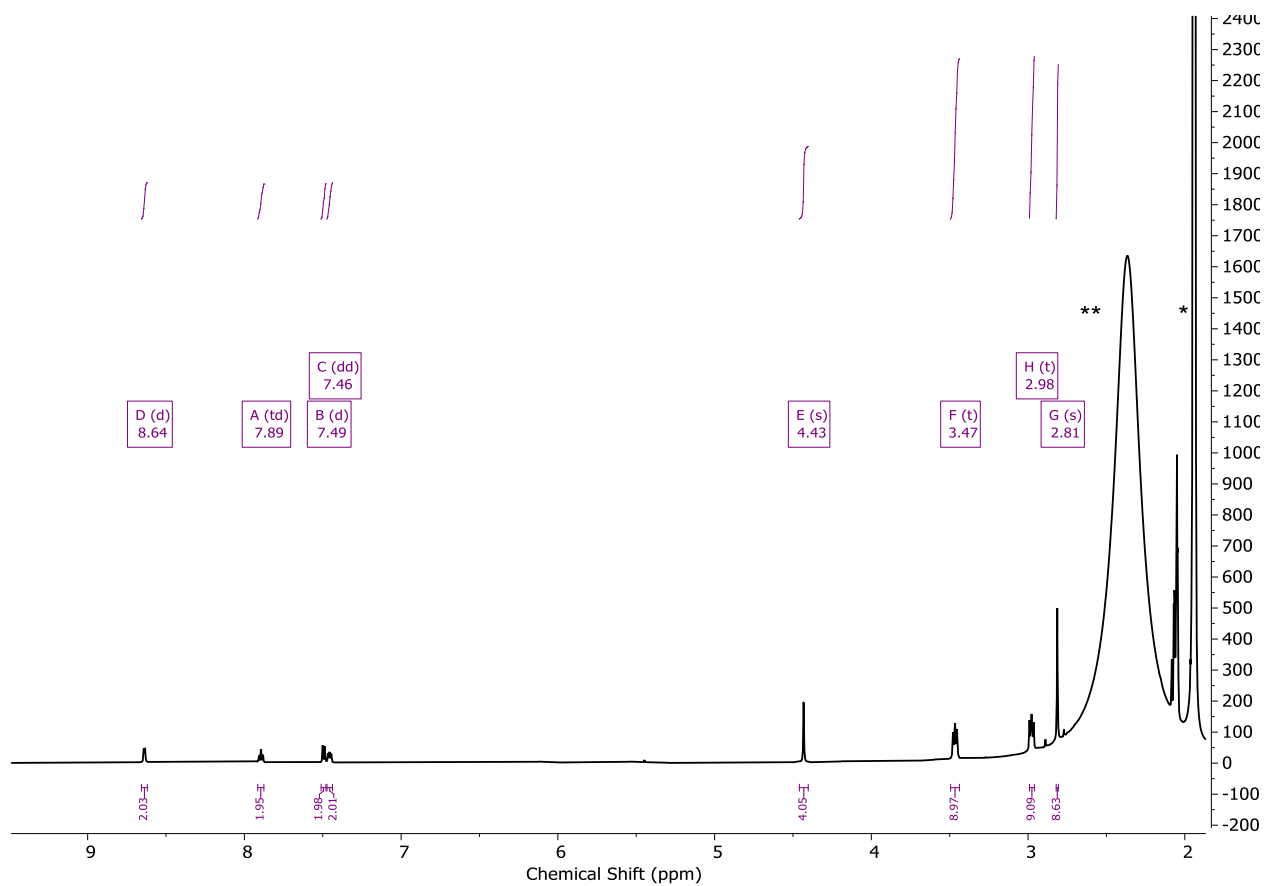

**Figure S9.**  $^1\text{H}$  NMR (600 MHz,  $\text{CD}_3\text{CN}^*$ ,  $25\text{ }^\circ\text{C}$ ):  $\text{N}_2\text{S}_4\text{-Py}$ . (\*\* $\text{H}_2\text{O}$ )

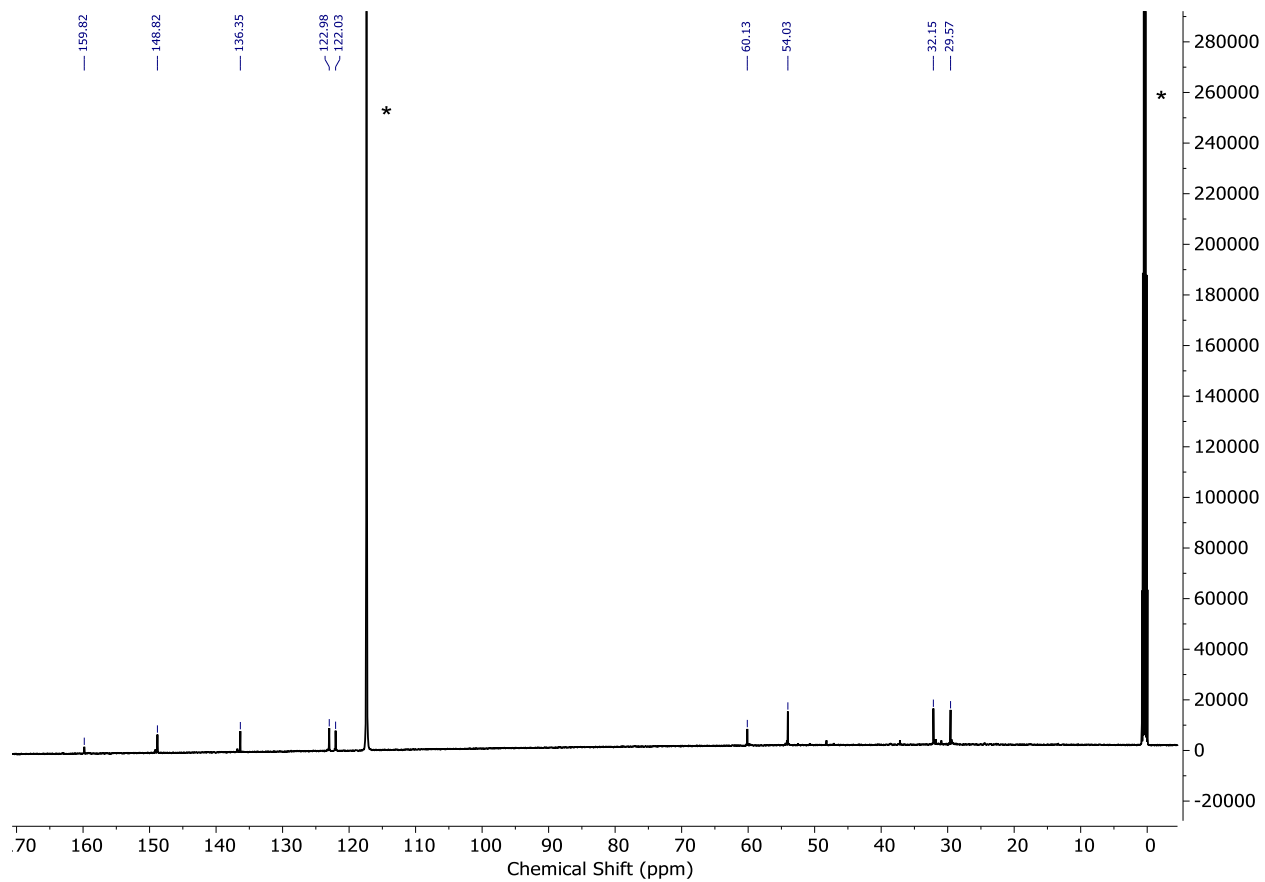

**Figure S10.**  $^{13}\text{C}\{^1\text{H}\}$  NMR (151 MHz,  $\text{CD}_3\text{CN}^*$ , 25 °C):  $\text{N}_2\text{S}_4\text{-Py}$ .

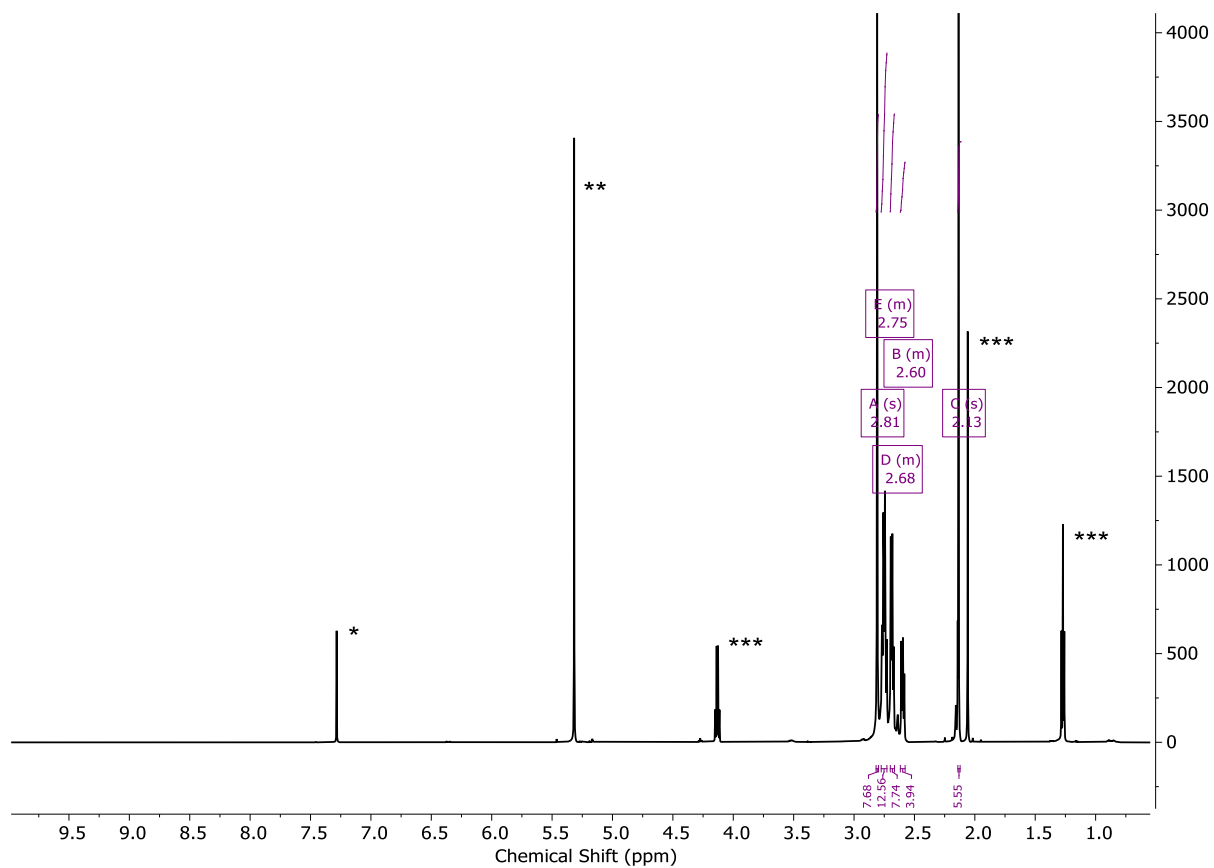

**Figure S11.** <sup>1</sup>H NMR (600 MHz, CDCl<sub>3</sub><sup>\*</sup>, 25 °C): N<sub>2</sub>S<sub>4</sub>-Thio. (\*\*CH<sub>2</sub>Cl<sub>2</sub>, \*\*\*ethyl acetate)

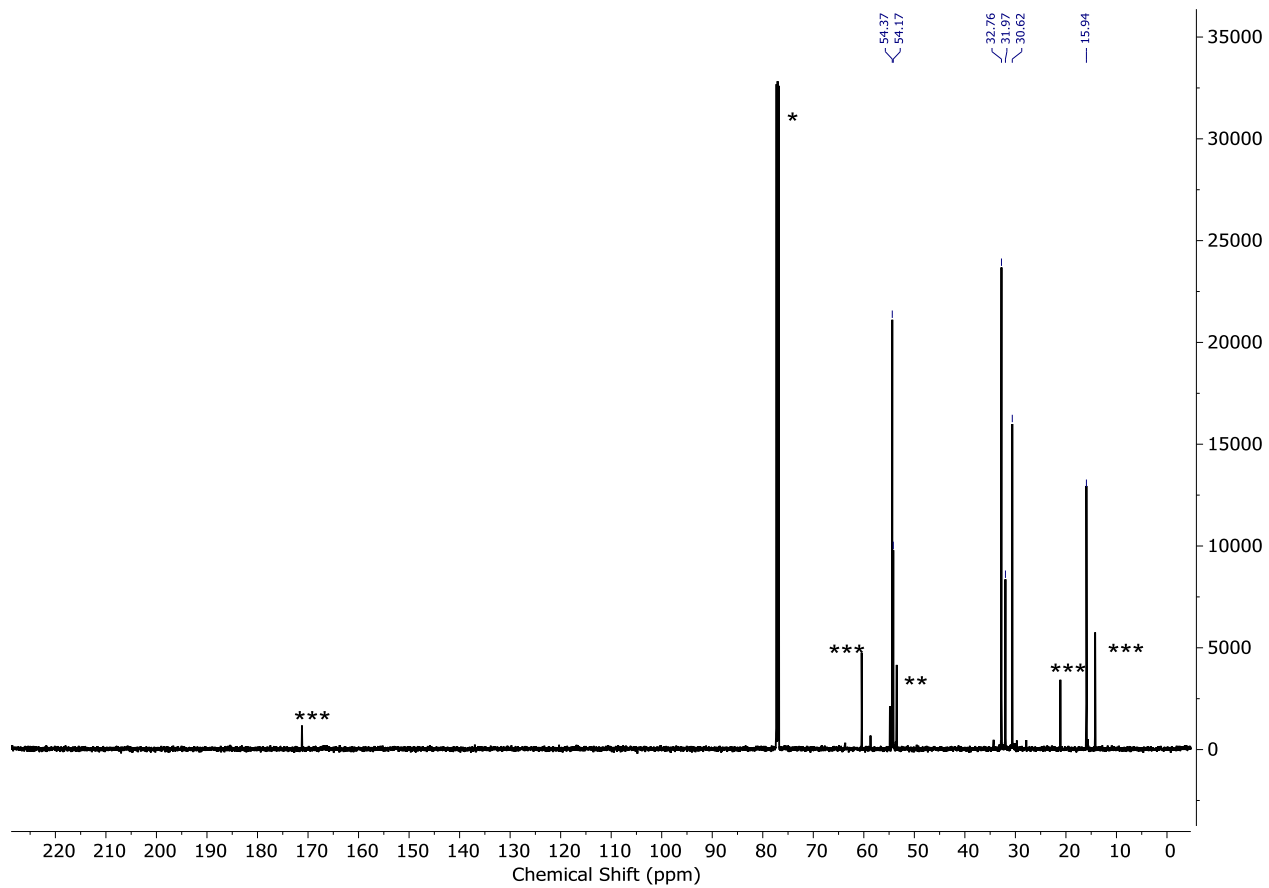

**Figure S12.**  $^{13}\text{C}\{^1\text{H}\}$  NMR (151 MHz,  $\text{CDCl}_3$ , 25 °C):  $\text{N}_2\text{S}_4\text{-Thio}$ . (\*\* $\text{CH}_2\text{Cl}_2$ , \*\*\*ethyl acetate)

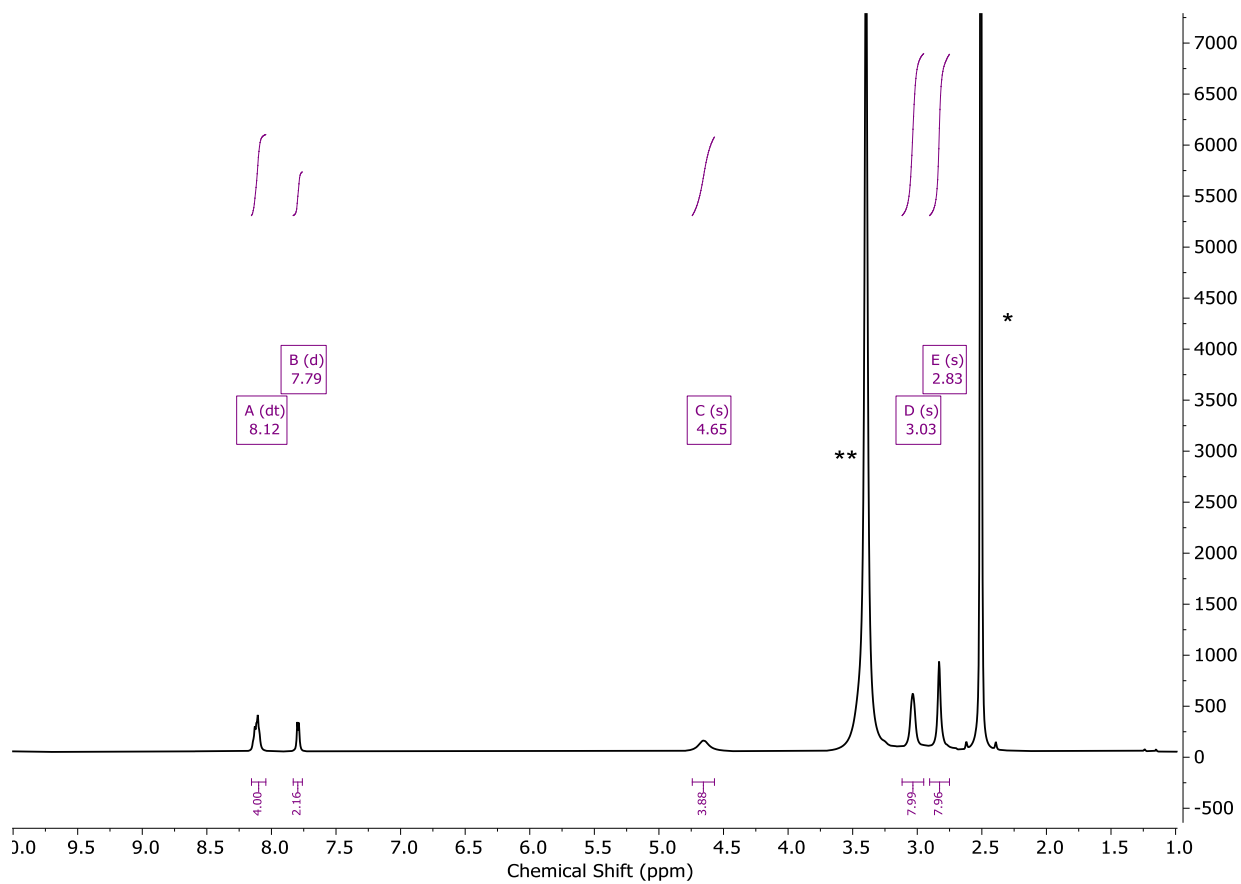

**Figure S13.**  $^1\text{H}$  NMR (600 MHz,  $\text{DMSO}-d_6^*$ , 25  $^\circ\text{C}$ ):  $[\text{natHg}(\text{N}_2\text{S}_4\text{-Pa})]$  at 24 h. (\*\* $\text{H}_2\text{O}$ )

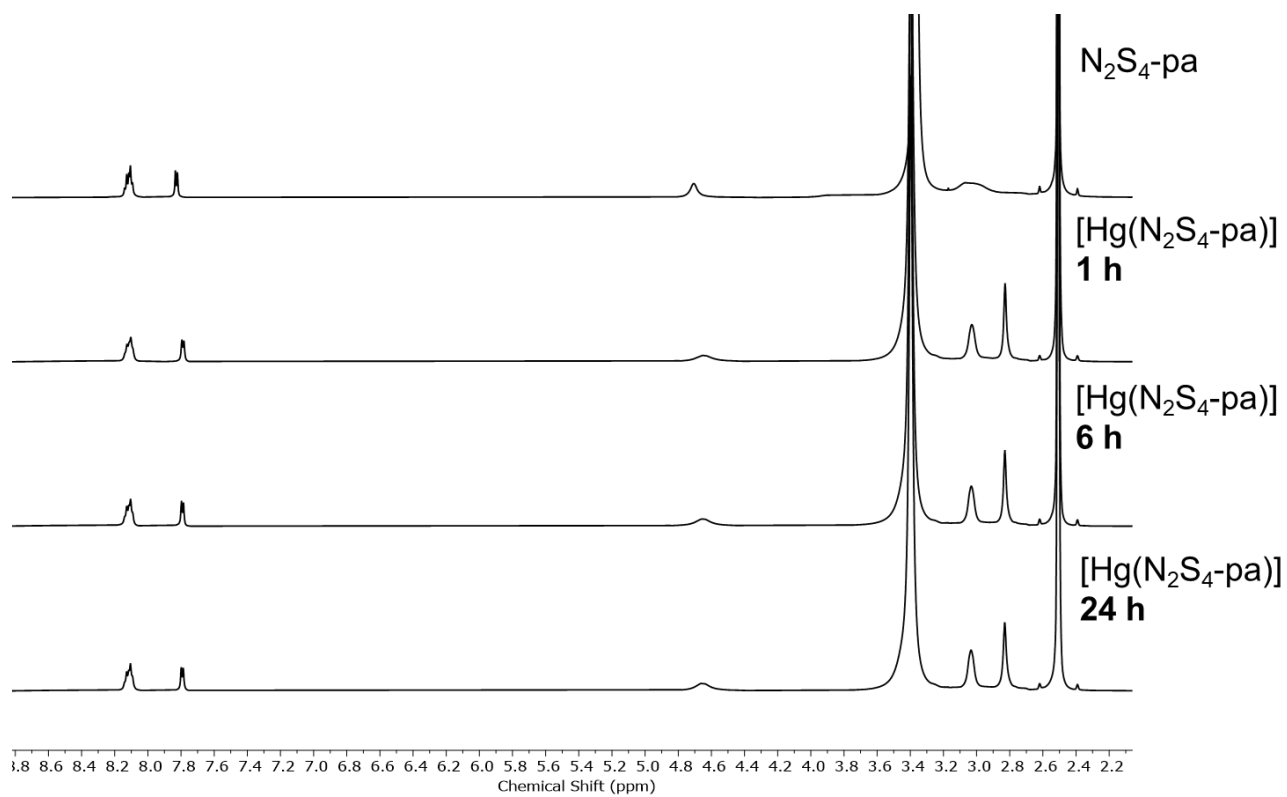

**Figure S14.**  $^1\text{H}$  NMR (600 MHz,  $\text{DMSO-}d_6$ , 25 °C):  $\text{N}_2\text{S}_4\text{-Pa}$  and  $[\text{natHg}(\text{N}_2\text{S}_4\text{-Pa})]$  formation over time.

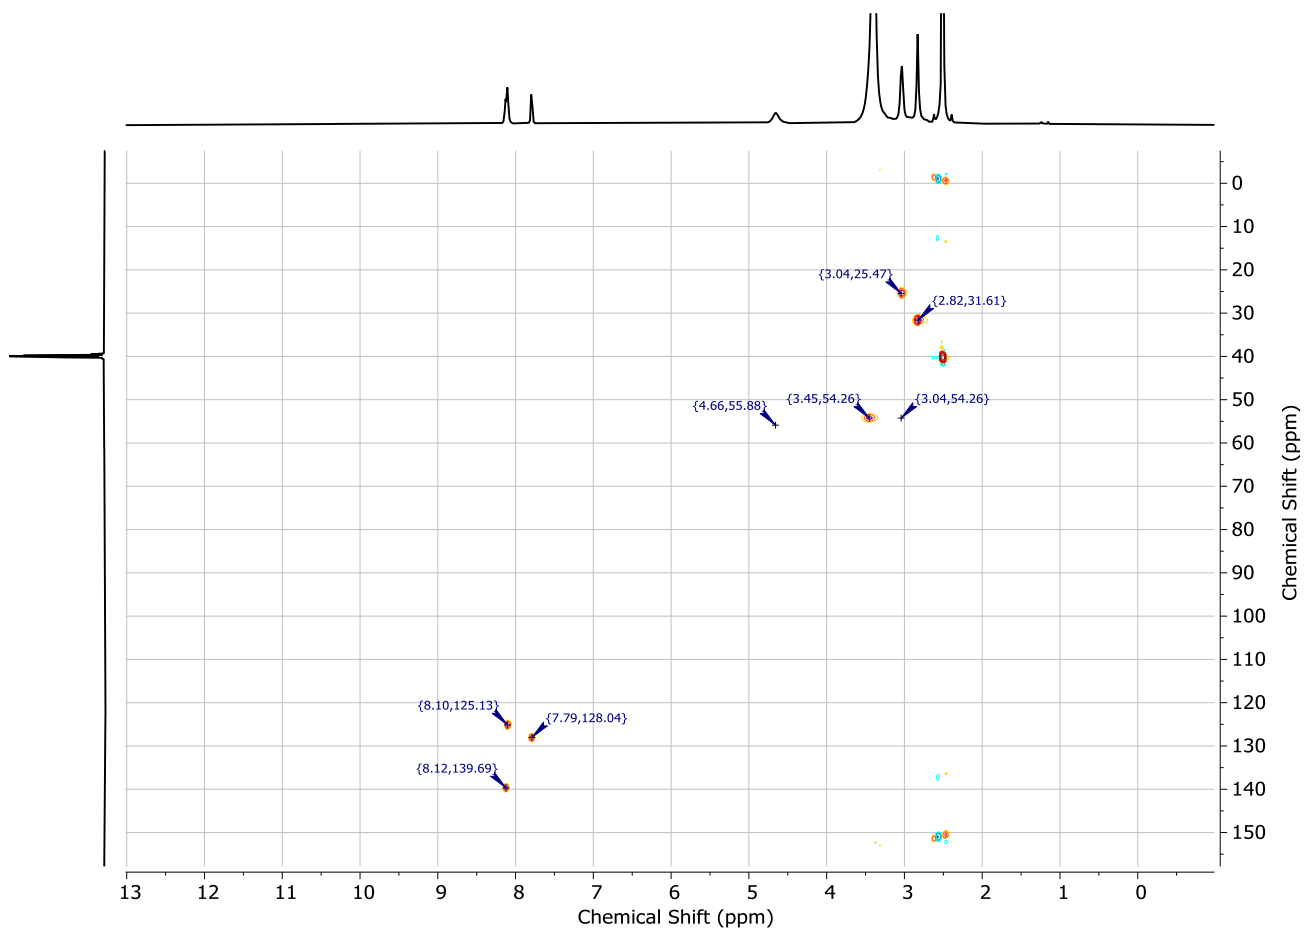

**Figure S15.**  $^1\text{H}$ - $^{13}\text{C}$  HSQC NMR(600 MHz- 161 MHz,  $\text{DMSO-}d_6$ ,  $25\text{ }^\circ\text{C}$ ):  $[\text{natHg}(\text{N}_2\text{S}_4\text{-Pa})]$ .



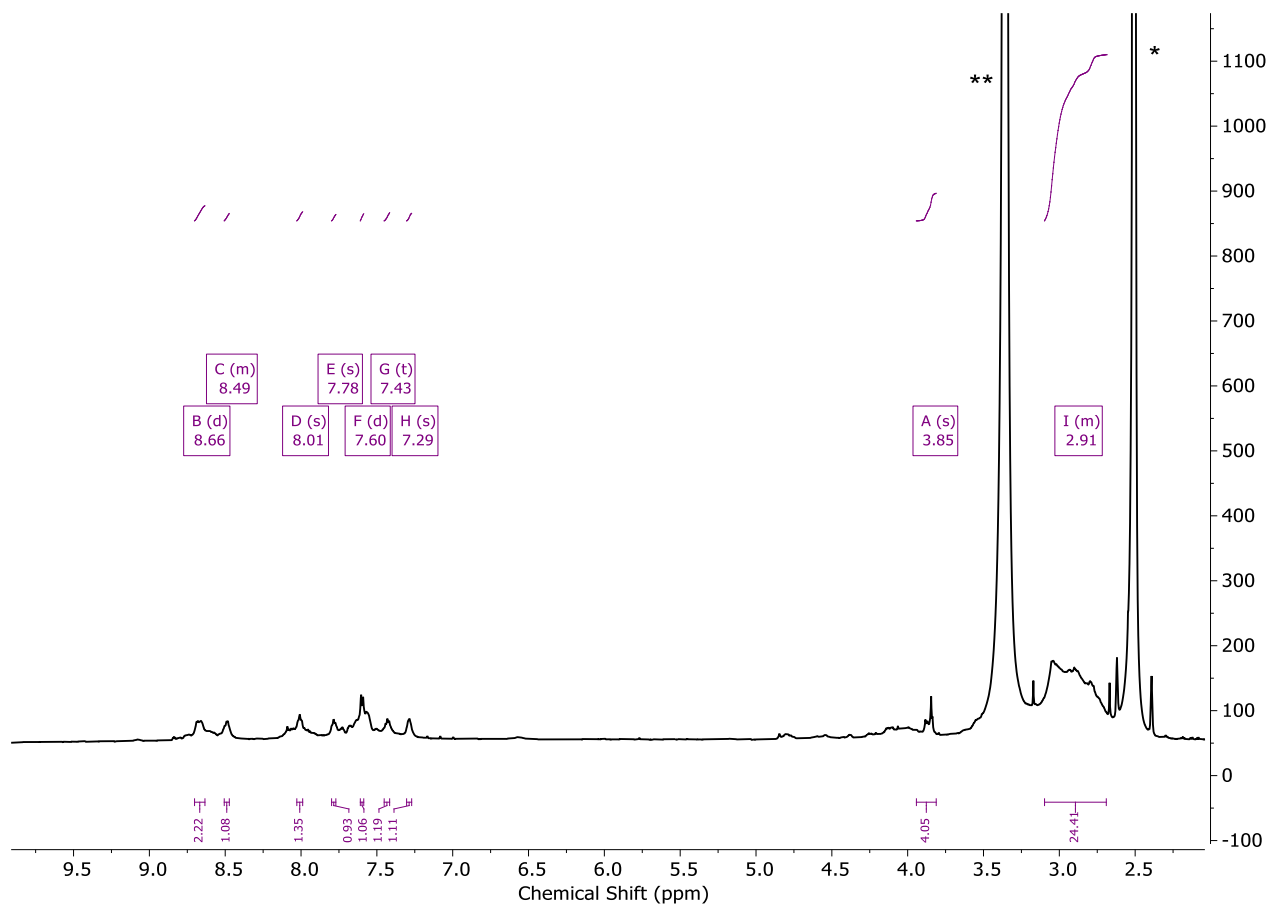

**Figure S16.**  $^1\text{H}$  NMR (600 MHz,  $\text{DMSO-}d_6^*$ ,  $25\text{ }^\circ\text{C}$ ):  $[\text{natHg}(\text{N}_2\text{S}_4\text{-Py})]^{2+}$  at 24 h. (\*\* $\text{H}_2\text{O}$ )

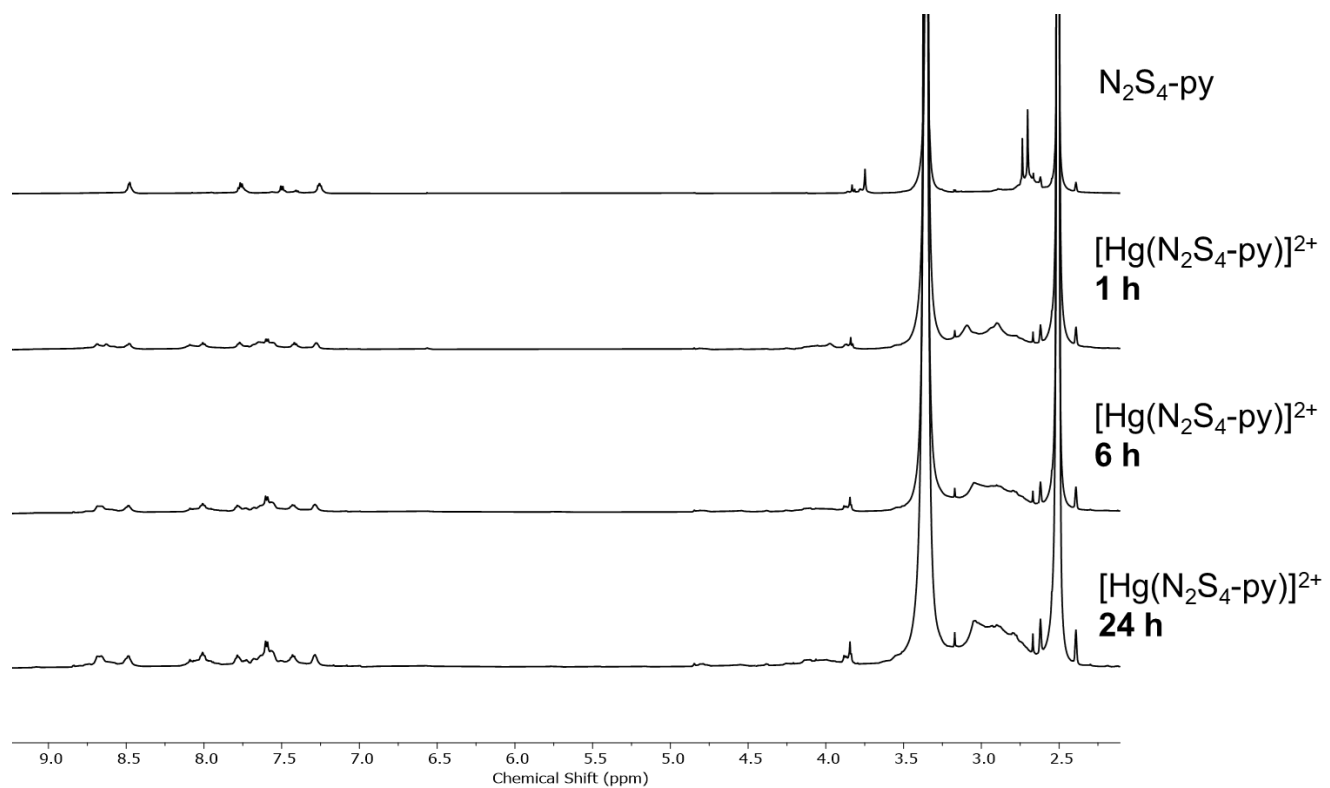

**Figure S17.**  $^1\text{H}$  NMR (600 MHz,  $\text{DMSO-}d_6$ , 25  $^\circ\text{C}$ ):  $\text{N}_2\text{S}_4\text{-Py}$  and  $[\text{nat}\text{Hg}(\text{N}_2\text{S}_4\text{-Py})]^{2+}$  formation over time.

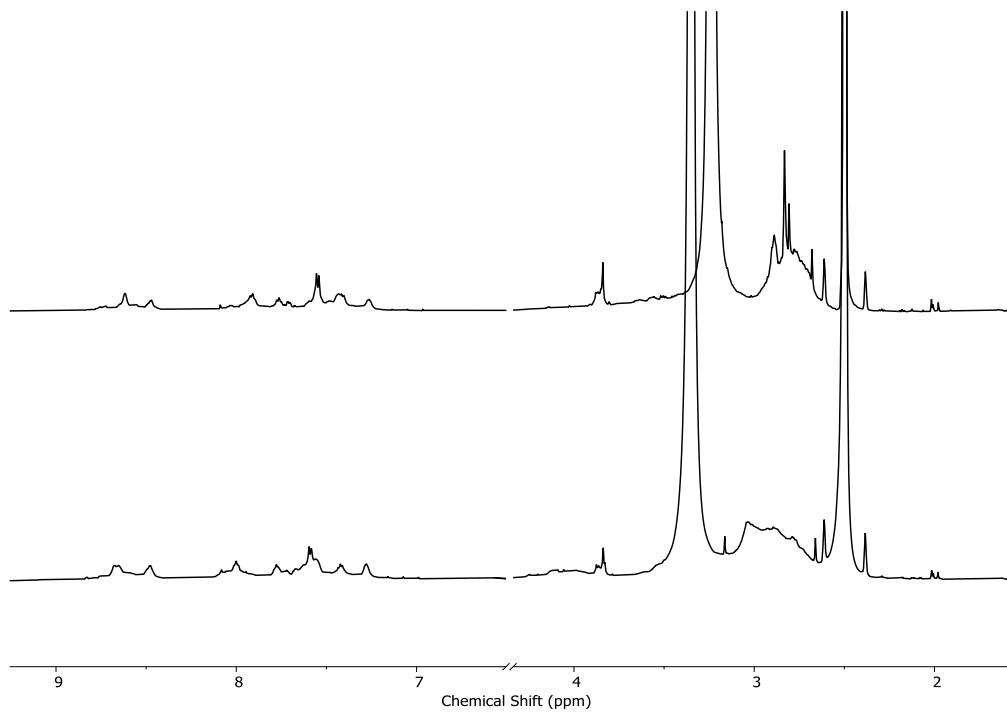

**Figure S18.** <sup>1</sup>H NMR (600 MHz, DMSO-*d*<sub>6</sub>): [<sup>nat</sup>Hg(N<sub>2</sub>S<sub>4</sub>-Py)]<sup>2+</sup> at 45 °C (top) and 25 °C (bottom).

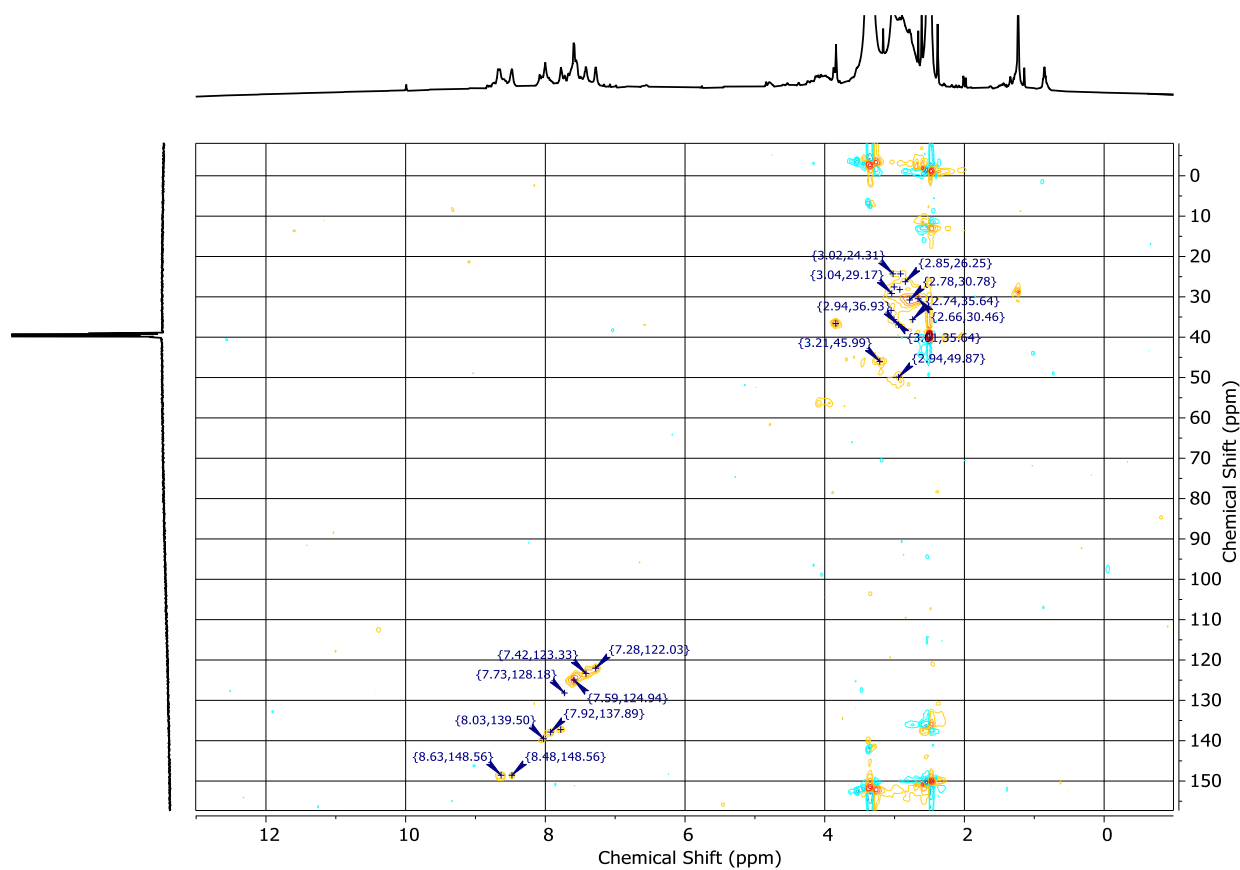

**Figure S19.**  $^1\text{H}$ - $^{13}\text{C}$  HSQC NMR(600 MHz- 161 MHz,  $\text{DMSO-}d_6$ ,  $25\text{ }^\circ\text{C}$ ):  $[\text{natHg}(\text{N}_2\text{S}_4\text{-Py})]^{2+}$ .

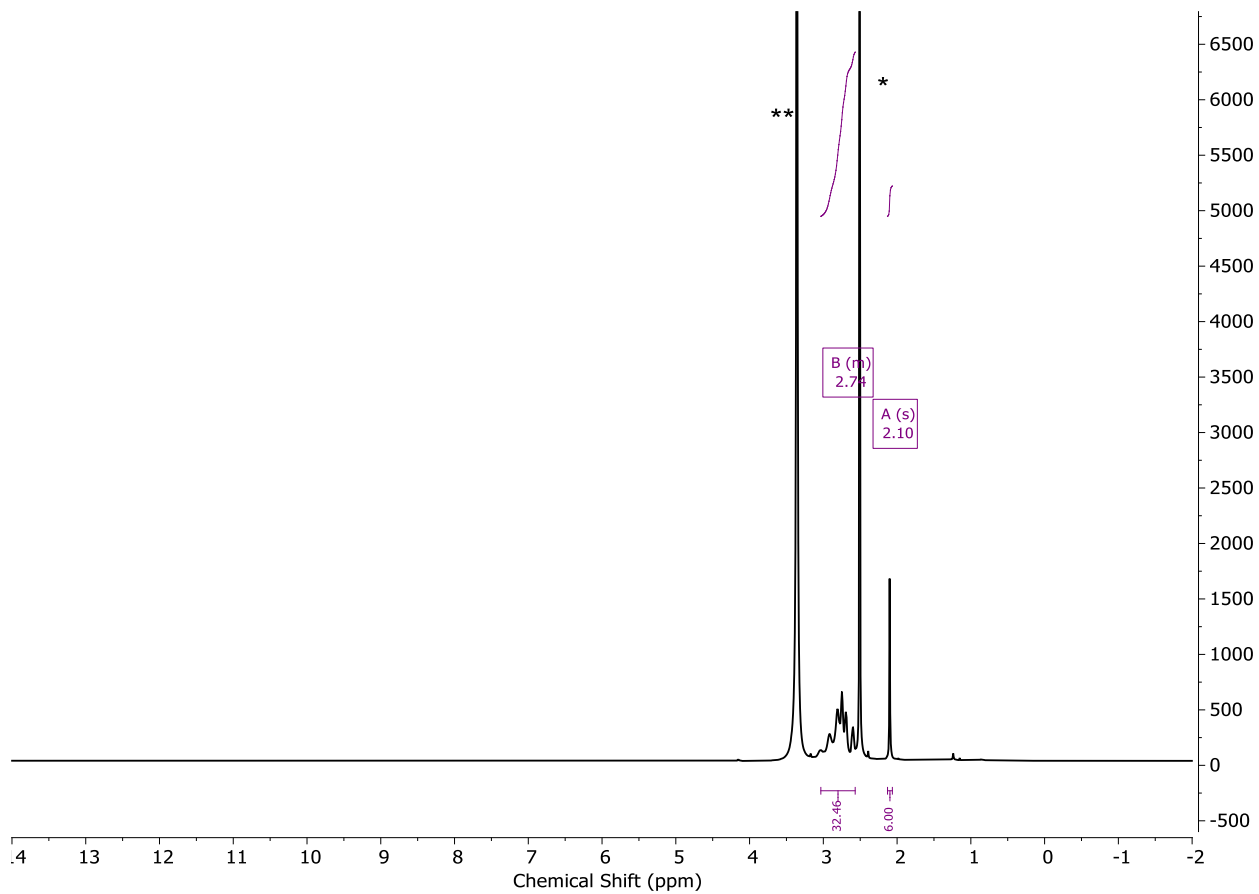

**Figure S20.**  $^1\text{H}$  NMR (600 MHz,  $\text{DMSO-}d_6^*$ , 25 °C):  $[\text{natHg}(\text{N}_2\text{S}_4\text{-Thio})]^{2+}$  at 24 h. (\*\* $\text{H}_2\text{O}$ )

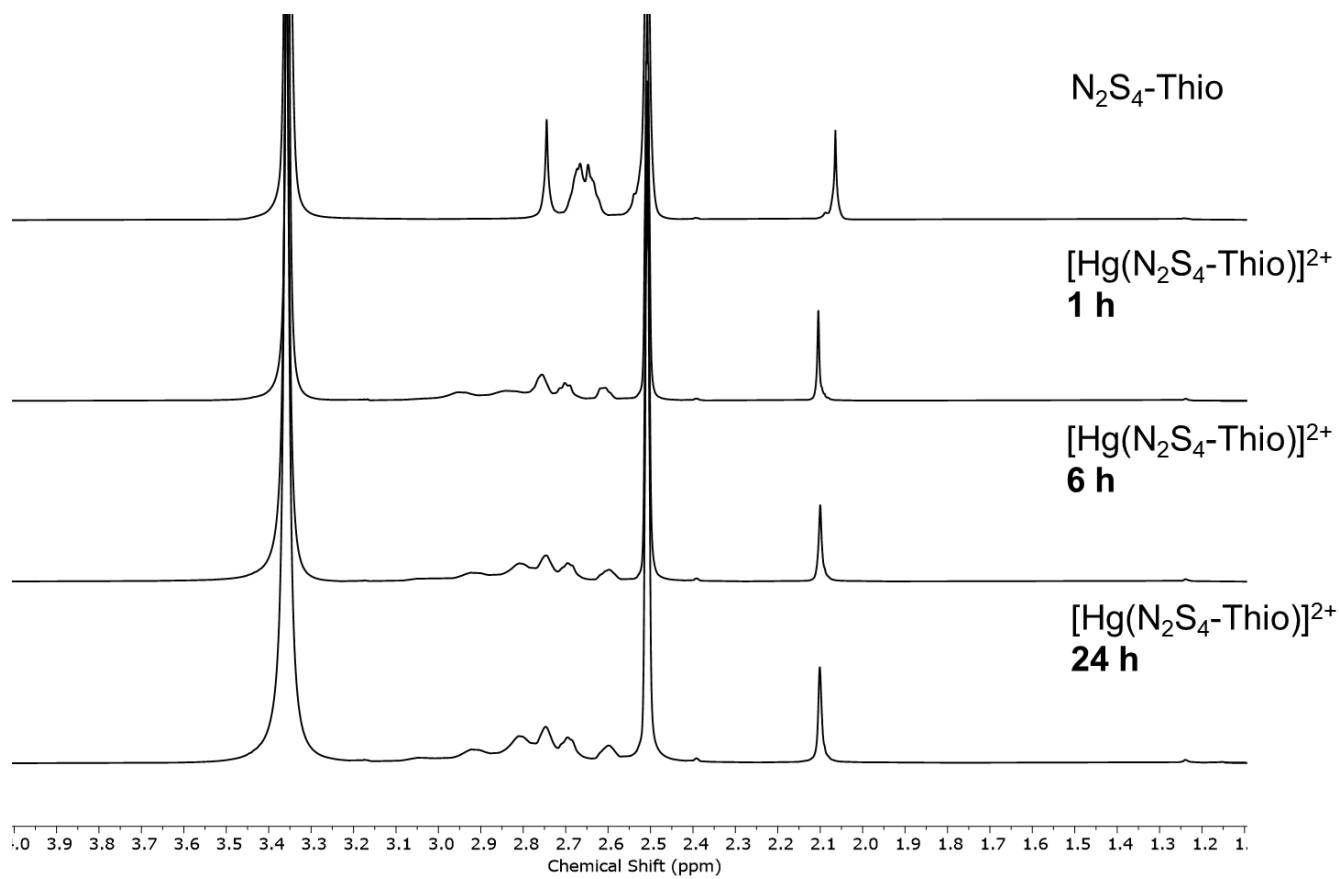

**Figure S21.**  $^1\text{H}$  NMR (600 MHz,  $\text{DMSO-}d_6$ , 25  $^\circ\text{C}$ ):  $\text{N}_2\text{S}_4\text{-Thio}$  and  $[\text{natHg}(\text{N}_2\text{S}_4\text{-Thio})]^{2+}$  formation over time.

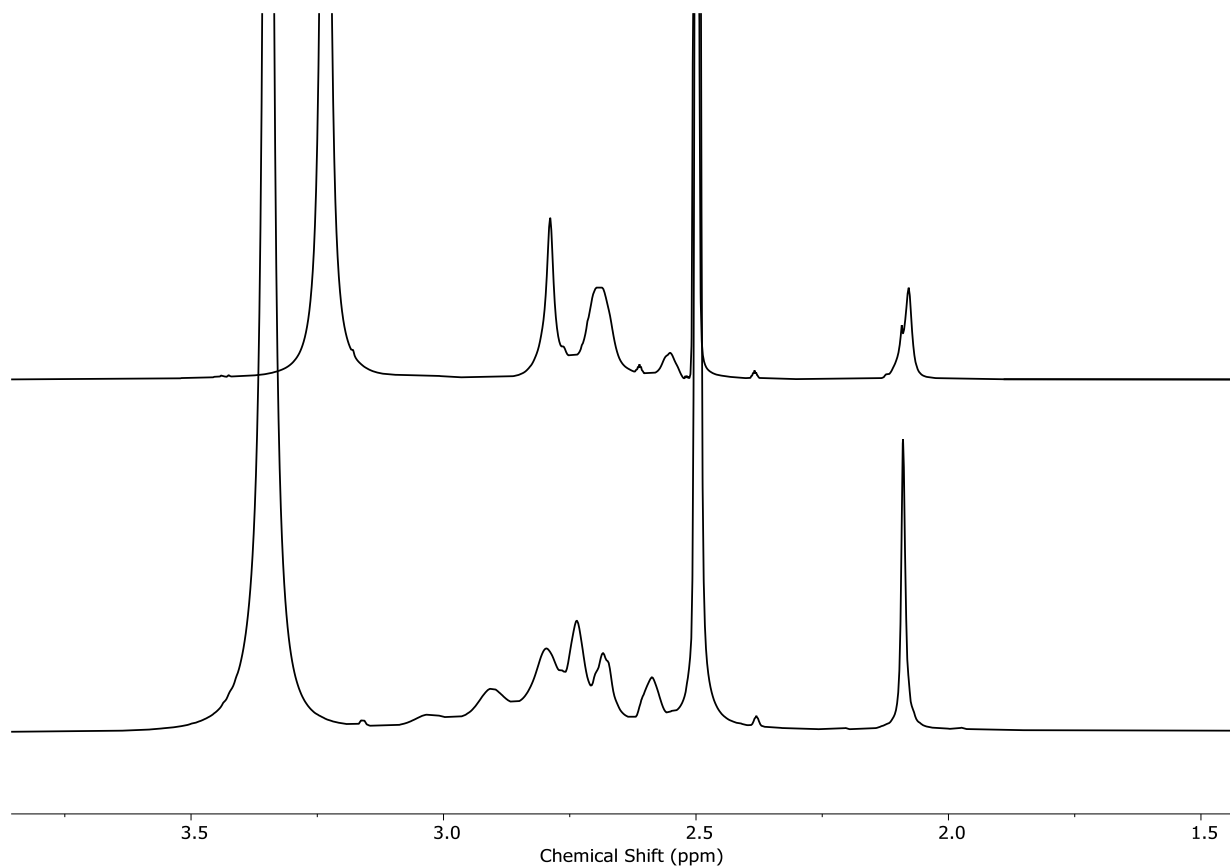

**Figure S22.**  $^1\text{H}$  NMR (600 MHz,  $\text{DMSO-}d_6$ ):  $[\text{natHg}(\text{N}_2\text{S}_4\text{-Thio})]^{2+}$  at 45 °C (top) and 25 °C (bottom).

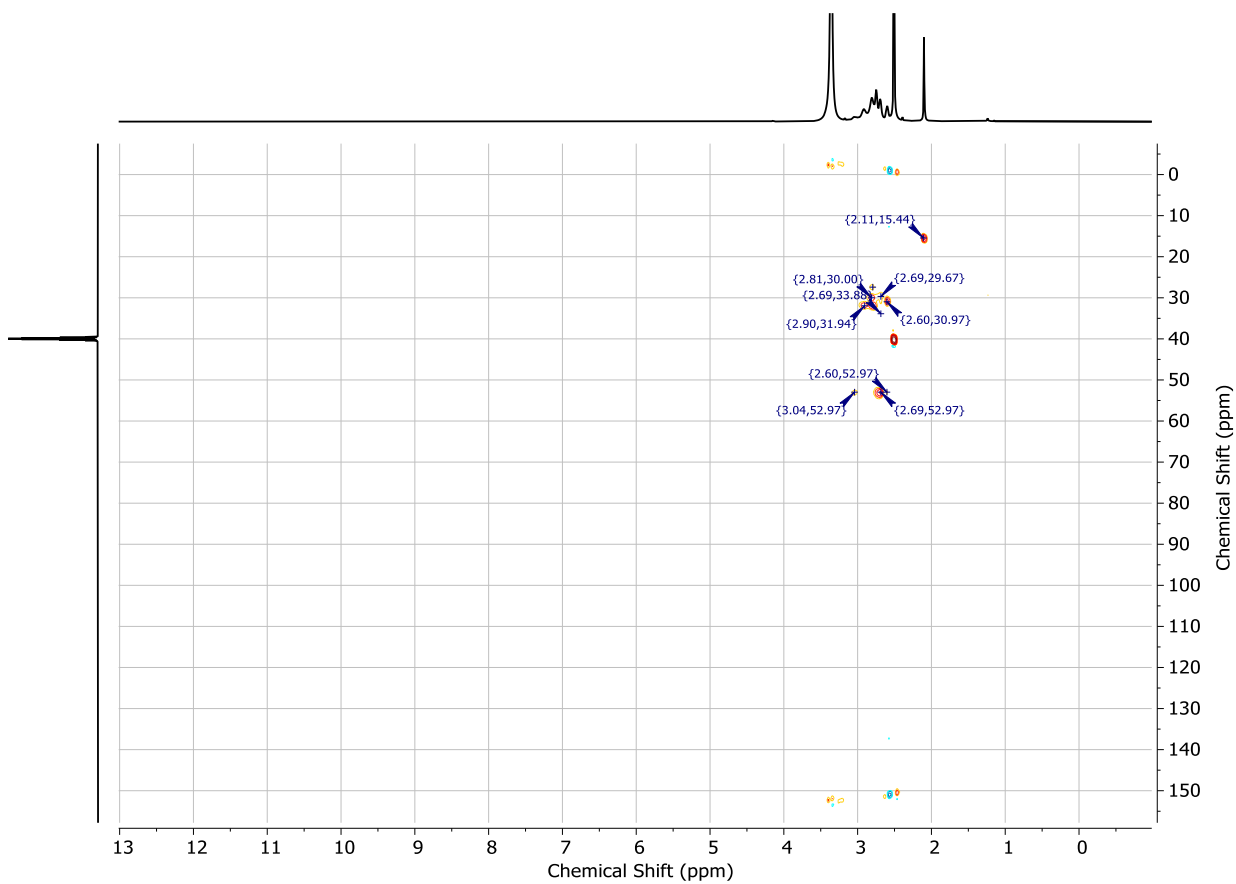

**Figure S23.**  $^1\text{H}$ - $^{13}\text{C}$  HSQC NMR(600 MHz- 161 MHz,  $\text{DMSO-}d_6$ ,  $25\text{ }^\circ\text{C}$ ):  $[\text{natHg}(\text{N}_2\text{S}_4\text{-Thio})]^{2+}$ .



## Mass Spectrometry

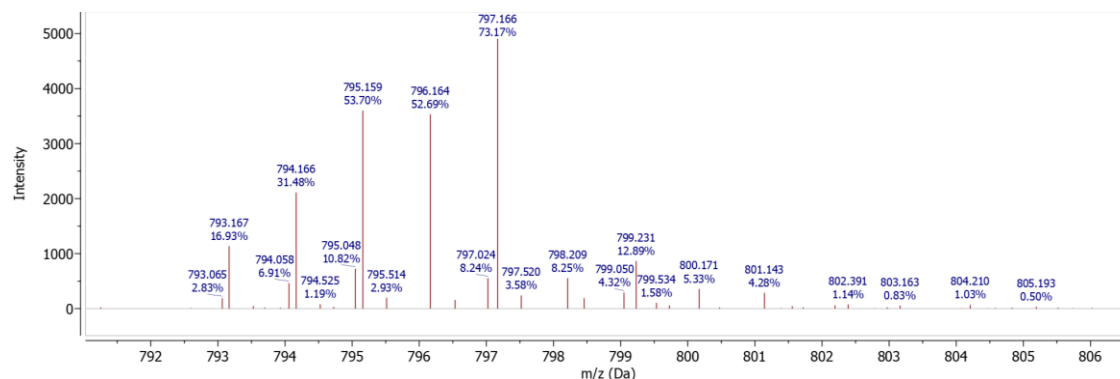

**Figure S24.** HRMS for [ $^{nat}\text{Hg}(\text{N}_2\text{S}_4\text{-Pa})$ ], ESI-HRMS  $m/z$  calcd. for  $[\text{C}_{26}\text{H}_{34}\text{N}_4\text{O}_4\text{S}_4\text{Hg} + \text{H}]^+$  797.125; found 797.166  $[\text{M}+\text{H}]^+$ .

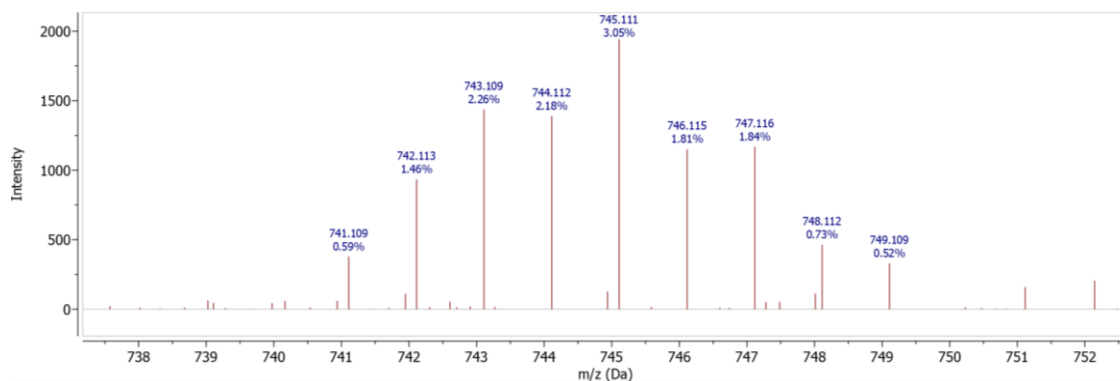

**Figure S25.** HRMS for [ $^{nat}\text{Hg}(\text{N}_2\text{S}_4\text{-Py})$ ] $^{2+}$ , ESI-HRMS  $m/z$  calcd. for  $[(\text{C}_{24}\text{H}_{36}\text{N}_4\text{S}_4\text{Hg})^{2+} + \text{Cl}]^+$  745.121; found 745.111  $[\text{M}+\text{Cl}]^+$ .

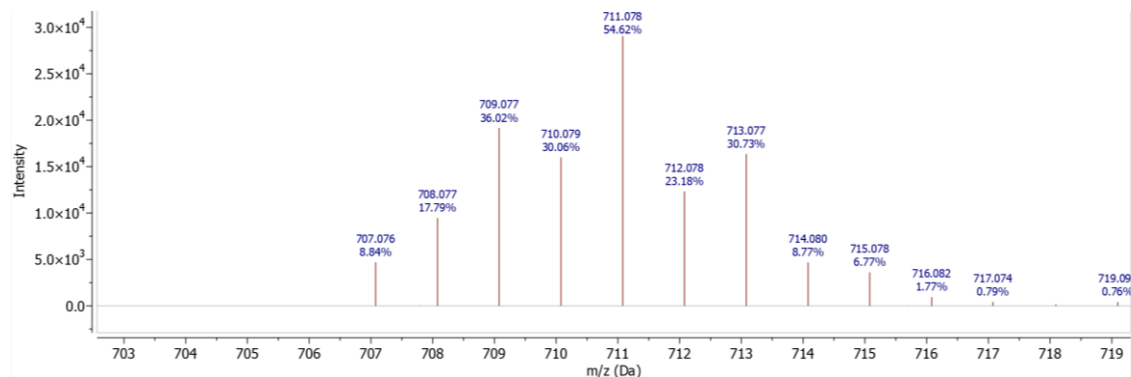

**Figure S26.** HRMS for [ $^{nat}\text{Hg}(\text{N}_2\text{S}_4\text{-Thio})$ ] $^{2+}$  ESI-HRMS  $m/z$  calcd. for  $[(\text{C}_{18}\text{H}_{38}\text{N}_2\text{S}_6\text{Hg})^{2+} + \text{Cl}]^+$  711.075; found 711.078  $[\text{M}+\text{Cl}]^+$ .

## Density Functional Theory

$\epsilon_0$  =Electronic energy

$\epsilon_{ZPE}$  =Zero point energy correction

$G_{corr}$  = Thermal free energy correction

$\Delta G_{solv}$  = Change in energy as a result of solvation

$$\begin{aligned} G_{gas} &= \epsilon_0 + \epsilon_{ZPE} + G_{corr} \\ G_{soln} &= G_{gas} + \Delta G_{solv} \end{aligned} \quad (1)0 \text{ h}$$

**Table S1.** Calculated  $\Delta G_{gas}$ ,  $\Delta G_{solv}$ ,  $G_{soln}$  and  $\Delta G_{soln}$  energies for all investigated conformers of the  $[\text{Hg}(\text{N}_2\text{S}_4\text{-Py})]^{2+}$  complex. The lowest energy conformation is highlighted in bold.

| Conformer | Sidearm Orientation | Backbone                                                             | Relative $G_{gas}$ (kJ/mol) | $\Delta G_{solv}$ (Hartree) | $G_{soln}$ (Hartree) | Relative $G_{soln}$ (kJ/mol) |
|-----------|---------------------|----------------------------------------------------------------------|-----------------------------|-----------------------------|----------------------|------------------------------|
| 1         | cis                 | $\lambda, \lambda, \delta, \lambda, \lambda, \delta$                 | 81.3                        | -0.22147                    | -2901.33939          | 21.1                         |
| 2         | trans               | $\delta, \lambda, \lambda, \delta, \lambda, \delta$                  | 14.3                        | -0.19454                    | -2901.33798          | 24.8                         |
| 3         | cis                 | $\delta, \lambda, \delta, \lambda, \lambda, \delta$                  | 39.4                        | -0.20408                    | -2901.33799          | 24.8                         |
| 4         | trans               | $\lambda, \lambda, \delta, \delta, \lambda, \delta$                  | 2.2                         | -0.19704                    | -2901.34511          | 6.1                          |
| 5         | cis                 | $\delta, \lambda, \delta, \lambda, \lambda, \lambda$                 | 0.0                         | -0.19632                    | -2901.34522          | 5.8                          |
| 6         | trans               | $\lambda, \lambda, \lambda, \delta, \lambda, \delta$                 | 2.3                         | -0.19762                    | -2901.34564          | 4.7                          |
| 7         | cis                 | $\delta, \lambda, \delta, \delta, \delta, \delta$                    | 43.6                        | -0.20984                    | -2901.34213          | 13.9                         |
| 8         | trans               | $\delta, \lambda, \lambda, \delta, \delta, \delta$                   | 42.2                        | -0.20428                    | -2901.33711          | 27.1                         |
| <b>9</b>  | <b>cis</b>          | <b><math>\delta, \lambda, \delta, \lambda, \delta, \delta</math></b> | <b>20.9</b>                 | <b>-0.20647</b>             | <b>-2901.34743</b>   | <b>0.0</b>                   |
| 10        | trans               | $\delta, \delta, \delta, \delta, \delta, \delta$                     | 24.1                        | -0.20407                    | -2901.34381          | 9.5                          |
| 11        | cis                 | $\delta, \delta, \delta, \lambda, \delta, \delta$                    | 39.7                        | -0.20301                    | -2901.33680          | 27.9                         |
| 12        | cis                 | $\delta, \delta, \delta, \lambda, \lambda, \delta$                   | 32.8                        | -0.20782                    | -2901.34425          | 8.3                          |
| 13        | trans               | $\delta, \lambda, \lambda, \delta, \delta, \lambda$                  | 27.7                        | -0.20466                    | -2901.34300          | 11.6                         |

**Table S2.** Calculated  $\Delta G_{\text{gas}}$ ,  $\Delta G_{\text{solv}}$ ,  $G_{\text{soln}}$  and  $\Delta G_{\text{soln}}$  energies for all investigated conformers of the  $[\text{Hg}(\text{N}_2\text{S}_4\text{-Thio})]^{2+}$  complex. The lowest energy conformation is highlighted in bold.

| Conformer | Sidearm Orientation | Backbone                                                              | Relative $G_{\text{gas}}$ (kJ/mol) | $\Delta G_{\text{solv}}$ (Hartree) | $G_{\text{soln}}$ (Hartree) | Relative $G_{\text{soln}}$ (kJ/mol) |
|-----------|---------------------|-----------------------------------------------------------------------|------------------------------------|------------------------------------|-----------------------------|-------------------------------------|
| 1         | cis                 | $\delta, \lambda, \delta, \lambda, \delta, \lambda$                   | 45.2                               | -0.21420                           | -3360.75521                 | 45.7                                |
| 2         | trans               | $\lambda, \delta, \lambda, \lambda, \lambda, \lambda$                 | 61.1                               | -0.21687                           | -3360.75183                 | 54.6                                |
| 3         | cis                 | $\lambda, \delta, \delta, \lambda, \lambda, \delta$                   | 43.4                               | -0.22067                           | -3360.76237                 | 26.9                                |
| 4         | trans               | $\lambda, \delta, \delta, \lambda, \lambda, \lambda$                  | 19.7                               | -0.21606                           | -3360.76678                 | 15.4                                |
| 5         | cis                 | $\lambda, \delta, \lambda, \delta, \lambda, \delta$                   | 19.0                               | -0.21819                           | -3360.76918                 | 9.1                                 |
| 6         | trans               | $\lambda, \delta, \lambda, \lambda, \delta, \delta$                   | 24.0                               | -0.20793                           | -3360.75701                 | 41.0                                |
| <b>7</b>  | <b>cis</b>          | <b><math>\delta, \lambda, \delta, \lambda, \delta, \lambda</math></b> | <b>9.8</b>                         | <b>-0.21816</b>                    | <b>-3360.77263</b>          | <b>0.0</b>                          |
| 8         | cis                 | $\lambda, \lambda, \lambda, \delta, \lambda, \delta$                  | 37.7                               | -0.22318                           | -3360.76702                 | 14.7                                |
| 9         | trans               | $\lambda, \lambda, \lambda, \lambda, \lambda, \lambda$                | 61.1                               | -0.21687                           | -3360.75183                 | 54.6                                |
| 10        | cis                 | $\lambda, \lambda, \delta, \lambda, \lambda, \delta$                  | 19.0                               | -0.21488                           | -3360.76585                 | 17.8                                |
| 11        | cis                 | $\lambda, \delta, \delta, \delta, \lambda, \delta$                    | 0.0                                | -0.20560                           | -3360.76381                 | 23.2                                |

**Table S3.** Calculated  $\Delta G_{\text{gas}}$ ,  $\Delta G_{\text{solv}}$ ,  $G_{\text{soln}}$  and  $\Delta G_{\text{soln}}$  energies for all investigated conformers of the  $[\text{Hg}(\text{N}_2\text{S}_4\text{-Pa})]$  complex. The lowest energy conformation is highlighted in bold.

| Conformer | Sidearm Orientation | Backbone                                                            | Relative $\Delta G_{\text{gas}}$ (kJ/mol) | $\Delta G_{\text{solv}}$ (Hartree) | $G_{\text{soln}}$ (Hartree) | Relative $\Delta G_{\text{soln}}$ (kJ/mol) |
|-----------|---------------------|---------------------------------------------------------------------|-------------------------------------------|------------------------------------|-----------------------------|--------------------------------------------|
| 1         | Cis                 | $\delta, \delta, \lambda, \delta, \lambda, \lambda$                 | 67.9                                      | -0.03788                           | -3277.69609                 | 58.2                                       |
| 2         | Trans               | $\delta, \delta, \delta, \lambda, \delta, \lambda$                  | 47.1                                      | -0.04202                           | -3277.70814                 | 26.6                                       |
| 3         | Cis                 | $\lambda, \delta, \delta, \delta, \lambda, \delta$                  | 33.6                                      | -0.04562                           | -3277.71688                 | 3.6                                        |
| 4         | Trans               | $\delta, \lambda, \delta, \lambda, \delta, \lambda$                 | 76.6                                      | -0.03391                           | -3277.68878                 | 77.4                                       |
| 5         | Cis                 | $\delta, \delta, \delta, \lambda, \delta, \lambda$                  | 32.8                                      | -0.04081                           | -3277.71239                 | 15.4                                       |
| 6         | Trans               | $\lambda, \lambda, \delta, \lambda, \delta, \lambda$                | 123.8                                     | -0.04292                           | -3277.67984                 | 100.9                                      |
| <b>7</b>  | <b>Cis</b>          | <b><math>\delta, \delta, \lambda, \delta, \delta, \delta</math></b> | <b>0.0</b>                                | <b>-0.03421</b>                    | <b>-3277.71827</b>          | <b>0.0</b>                                 |
| 8         | Trans               | $\delta, \lambda, \delta, \delta, \lambda, \lambda$                 | 54.4                                      | -0.02791                           | -3277.69124                 | 71.0                                       |
| 9         | Cis                 | $\lambda, \lambda, \delta, \delta, \delta, \lambda$                 | 0.6                                       | -0.03383                           | -3277.71767                 | 1.6                                        |
| 10        | Trans               | $\delta, \delta, \delta, \lambda, \lambda, \lambda$                 | 35.7                                      | -0.03808                           | -3277.70854                 | 25.5                                       |
| 11        | Cis                 | $\delta, \delta, \lambda, \delta, \delta, \lambda$                  | 37.9                                      | -0.04314                           | -3277.71278                 | 14.4                                       |

**Table S4.** Selected bond angles and distances for conformers 5 ( $\Delta G_{\text{gas}} = 0$  kJ/mol) and 9 ( $\Delta G_{\text{soln}} = 0$  kJ/mol) of the  $[\text{Hg}(\text{N}_2\text{S}_4\text{-Py})]^{2+}$  complex.

| Bond Length (Å) |             |             | Bond Angle (°)  |             |             |
|-----------------|-------------|-------------|-----------------|-------------|-------------|
|                 | Conformer 5 | Conformer 9 |                 | Conformer 5 | Conformer 9 |
| <b>S1-Hg</b>    | 2.909       | 2.724       | <b>S1-Hg-S2</b> | 75.6        | 78.3        |
| <b>S2-Hg</b>    | 2.823       | 2.925       | <b>S2-Hg-N4</b> | 62.7        | 70.1        |
| <b>S3-Hg</b>    | 2.841       | 2.773       | <b>N4-Hg-S3</b> | 66.1        | 75.9        |
| <b>S4-Hg</b>    | 2.852       | 4.321       | <b>S3-Hg-S4</b> | 77.6        | 56.8        |
| <b>N1-Hg</b>    | 2.985       | 2.934       | <b>S4-Hg-N1</b> | 67.7        | 53.6        |
| <b>N2-Hg</b>    | 2.501       | 2.436       | <b>N1-Hg-S1</b> | 63.7        | 71.4        |
| <b>N3-Hg</b>    | 2.525       | 2.539       |                 |             |             |
| <b>N4-Hg</b>    | 3.000       | 2.693       |                 |             |             |

**Table S5.** Selected bond angles and distances for conformers 7 ( $\Delta G_{\text{gas}} = 0$  kJ/mol) and 11 ( $\Delta G_{\text{soln}} = 0$  kJ/mol) of the  $[\text{Hg}(\text{N}_2\text{S}_4\text{-Thio})]^{2+}$  complex.

| Bond Length (Å) |              |             | Bond Angle (°)  |              |             |
|-----------------|--------------|-------------|-----------------|--------------|-------------|
|                 | Conformer 11 | Conformer 7 |                 | Conformer 11 | Conformer 7 |
| <b>S1-Hg</b>    | 2.939        | 2.941       | <b>S1-Hg-S2</b> | 71.5         | 76.3        |
| <b>S2-Hg</b>    | 2.857        | 2.767       | <b>S2-Hg-N2</b> | 67.8         | 66.4        |
| <b>S3-Hg</b>    | 2.861        | 2.596       | <b>N2-Hg-S3</b> | 69.1         | 62.2        |
| <b>S4-Hg</b>    | 2.696        | 3.898       | <b>S3-Hg-S4</b> | 78.5         | 56.3        |
| <b>S5-Hg</b>    | 2.961        | 2.658       | <b>S4-Hg-N1</b> | 57.4         | 50.6        |
| <b>S6-Hg</b>    | 2.698        | 2.787       | <b>N1-Hg-S1</b> | 54.9         | 56.4        |
| <b>N1-Hg</b>    | 3.755        | 3.858       |                 |              |             |
| <b>N2-Hg</b>    | 3.031        | 3.166       |                 |              |             |

**Table S6.** Selected bond angles and distances for conformer 11, 7 and 3 ( $\Delta G_{\text{gas}} = 0$  kJ/mol) and 9 ( $\Delta G_{\text{soln}} = 0$  kJ/mol) of the  $[\text{natHg}][\text{Hg}(\text{N}_2\text{S}_4\text{-Pa})]$  complex.

| Bond Length (Å) |          |         | Bond Length (Å) |              |         |         |       |
|-----------------|----------|---------|-----------------|--------------|---------|---------|-------|
|                 | Conf. 11 | Conf. 7 | Conf. 3         | Conf. 11     | Conf. 7 | Conf 3. |       |
| <b>S1-Hg</b>    | 2.659    | 3.905   | 2.737           | <b>O1-Hg</b> | 2.471   | 2.445   | 2.378 |
| <b>S2-Hg</b>    | 3.693    | 2.756   | 4.022           | <b>O2-Hg</b> | 2.380   | 2.431   | 2.413 |
| <b>S3-Hg</b>    | 3.408    | 3.994   | 4.753           | <b>N2-Hg</b> | 2.524   | 2.482   | 2.444 |
| <b>S4-Hg</b>    | 4.218    | 2.731   | 2.737           | <b>N3-Hg</b> | 2.450   | 2.542   | 2.417 |
| <b>N1-Hg</b>    | 3.052    | 3.111   | 2.938           | <b>N4-Hg</b> | 3.070   | 3.238   | 3.684 |

## Radiolabeling and Stability

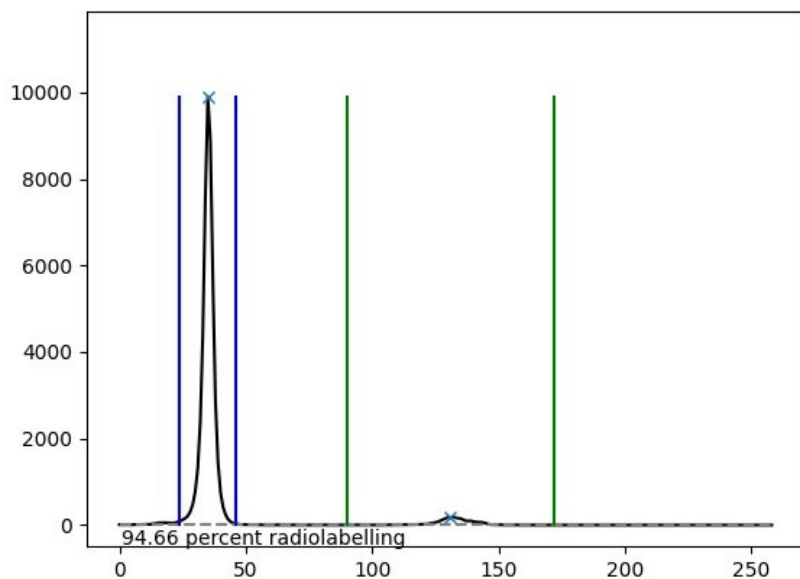

**Figure S27.** iTLC of  $\text{N}_2\text{S}_4\text{-Thio}$  at  $10^{-4}$  M, showing 94.7% RCY at 80 °C.

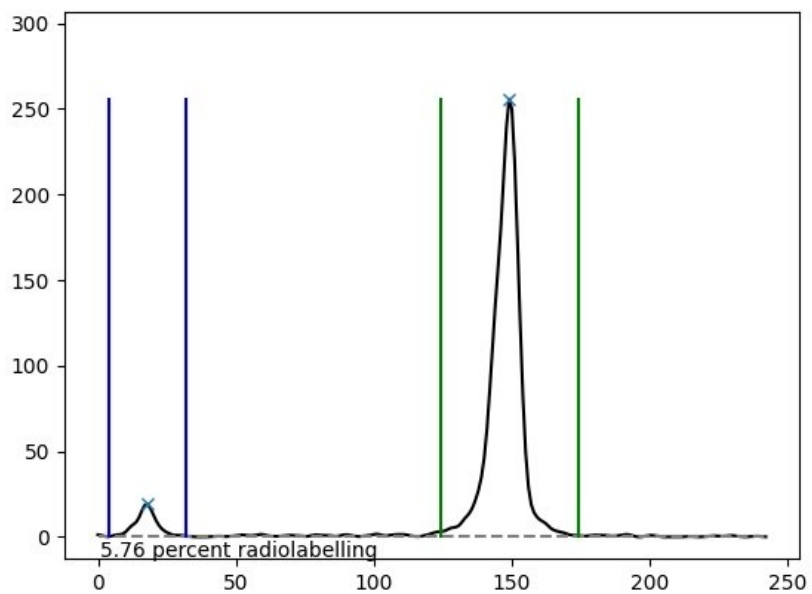

**Figure S28.** iTLC of  $N_2S_4$ -Thio at  $10^{-6}$  M, showing 5.8 % RCY at 80 °C.

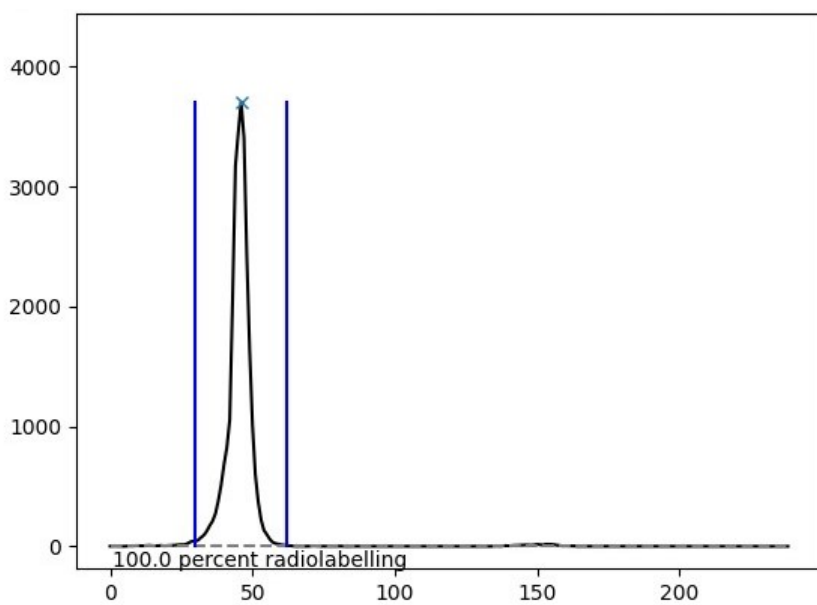

**Figure S29.** iTLC of  $N_2S_4$ -Py at  $10^{-4}$  M, showing 100 % RCY at 80 °C.

**Table S7.** Average RCYs (%) of [<sup>197m</sup>gHg]Hg-Complexes at 80 °C after 60 min, in 1 M NH<sub>4</sub>OAc buffer (pH 7).

| %RCY                                                                          | Concentration (M) |                  |                  |                  |
|-------------------------------------------------------------------------------|-------------------|------------------|------------------|------------------|
|                                                                               | 10 <sup>-4</sup>  | 10 <sup>-5</sup> | 10 <sup>-6</sup> | 10 <sup>-7</sup> |
| [ <sup>197m</sup> gHg][Hg(N <sub>2</sub> S <sub>4</sub> -Py)] <sup>2+</sup>   | 100.0 ± 0.0%      | 86.2 ± 1.9 %     | 17.3 ± 6.6 %     | 6.3 ± 2.4 %      |
| [ <sup>197m</sup> gHg][Hg(N <sub>2</sub> S <sub>4</sub> -Thio)] <sup>2+</sup> | 96.8 ± 0.5%       | 65.0 ± 4.5 %     | 11.9 ± 9.0 %     | 6.4 ± 1.0 %      |
| [ <sup>197m</sup> gHg][Hg(N <sub>2</sub> S <sub>4</sub> -Pa)] <sup>2+</sup>   | 26.0 ± 1.3%       | -                | -                | -                |
| [ <sup>197m</sup> gHg][Hg(NS <sub>4</sub> -BA)] <sup>2+*</sup>                | 100.0 ± 0.0%      | 97.0 ± 0.3 %     | 31.3 ± 2.0 %     | -                |

\*[<sup>197m</sup>gHg][Hg(NS<sub>4</sub>-BA)]<sup>2+</sup> radiolabeling data is reproduced from Randhawa *et al.* after 1 h.<sup>1</sup>

**Table S8.** Average RCYs (%) of [<sup>197m</sup>gHg]Hg-Complexes at 25 °C after 60 min, in 1 M NH<sub>4</sub>OAc buffer (pH 7).

| %RCY                                                                          | Concentration (M) |                  |                  |                  |
|-------------------------------------------------------------------------------|-------------------|------------------|------------------|------------------|
|                                                                               | 10 <sup>-4</sup>  | 10 <sup>-5</sup> | 10 <sup>-6</sup> | 10 <sup>-7</sup> |
| [ <sup>197m</sup> gHg][Hg(N <sub>2</sub> S <sub>4</sub> -Py)] <sup>2+</sup>   | 37.0 ± 3.3 %      | -                | -                | -                |
| [ <sup>197m</sup> gHg][Hg(N <sub>2</sub> S <sub>4</sub> -Thio)] <sup>2+</sup> | 95.5 ± 1.8 %      | 12.3 ± 2.6 %     | 5.3 ± 4.0 %      | -                |
| [ <sup>197m</sup> gHg][Hg(N <sub>2</sub> S <sub>4</sub> -Pa)] <sup>2+</sup>   | 33.1 ± 0.2 %      | -                | -                | -                |

**Table S9.** Kinetic inertness of [<sup>197m</sup>gHg]Hg-Complexes at 37 °C against human serum. (n=3)

| <sup>197m</sup> gHg-complex<br>% intact                                       | Time point (h) |              |              |    |              |
|-------------------------------------------------------------------------------|----------------|--------------|--------------|----|--------------|
|                                                                               | 1              | 3            | 16           | 24 | 72           |
| [ <sup>197m</sup> gHg][Hg(N <sub>2</sub> S <sub>4</sub> -Py)] <sup>2+</sup>   | 71. ± 2.2 %    | 57.2 ± 8.2 % | 58.9 ± 8.7 % | -  | 65.1 ± 1.5 % |
| [ <sup>197m</sup> gHg][Hg(N <sub>2</sub> S <sub>4</sub> -Thio)] <sup>2+</sup> | 75.5 ± 0.8 %   | 67.8 ± 5.0 % | 70.8 ± 0.1 % | -  | 60.3 ± 2.1 % |
| [ <sup>197m</sup> gHg][Hg(NS <sub>4</sub> -BA)] <sup>2+*</sup>                | 84.7 ± 3.4 %   | 74.1 ± 7.0 % | -            | -  | -            |

\*[<sup>197m</sup>gHg][Hg(NS<sub>4</sub>-BA)]<sup>2+</sup> radiolabeling data is reproduced from Randhawa *et al.* after 1 h.<sup>1</sup>

**Table S10.** Kinetic inertness of [<sup>197m/g</sup>Hg]Hg-Complexes at 37 °C against GSH. (n=3)

| <sup>197m/g</sup> Hg-complex<br>% intact                                       | Time point (h) |              |              |             |              |
|--------------------------------------------------------------------------------|----------------|--------------|--------------|-------------|--------------|
|                                                                                | 1              | 3            | 10           | 24          | 72           |
| [ <sup>197m/g</sup> Hg][Hg(N <sub>2</sub> S <sub>4</sub> -Py)] <sup>2+</sup>   | 85.8 ± 0.4 %   | 72.6 ± 0.4 % | -            | 32.0 ± 5.1% | -            |
| [ <sup>197m/g</sup> Hg][Hg(N <sub>2</sub> S <sub>4</sub> -Thio)] <sup>2+</sup> | 77.8 ± 0.4 %   | 75.1 ± 3.0 % | -            | 43.7 ± 3.2% | -            |
| [ <sup>197m/g</sup> Hg][Hg(NS <sub>4</sub> -BA)] <sup>2+*</sup>                | 100.0 ± 0.0 %  | -            | 97.3 ± 0.3 % | -           | 92.3 ± 0.5 % |

\*[<sup>197m/g</sup>Hg][Hg(NS<sub>4</sub>-BA)]<sup>2+</sup> radiolabeling data is reproduced from Randhawa *et al.* after 1 h.<sup>1</sup>

**Table S11.** Kinetic inertness of [<sup>197m/g</sup>Hg]Hg-Complexes at 25 °C against stable biologically relevant metals (ZnCl<sub>2</sub>, FeCl<sub>3</sub>, CuCl<sub>2</sub>, MgCl<sub>2</sub> and CoCl<sub>2</sub>). (n=3)

| <sup>197m/g</sup> Hg-complex % intact                                          | Time point (h) |              |              |
|--------------------------------------------------------------------------------|----------------|--------------|--------------|
|                                                                                | 24             | 48           | 85           |
| [ <sup>197m/g</sup> Hg][Hg(N <sub>2</sub> S <sub>4</sub> -Py)] <sup>2+</sup>   | 90.8 ± 8.7 %   | 83.9 ± 5.0 % | 73.0 ± 7.0 % |
| [ <sup>197m/g</sup> Hg][Hg(N <sub>2</sub> S <sub>4</sub> -Thio)] <sup>2+</sup> | 86.2 ± 1.7 %   | 86.0 ± 2.6 % | 86.9 ± 3.2 % |

## References

- (1) Gonçalves, P. F. B.; Stassen, H. Calculation of the Free Energy of Solvation from Molecular Dynamics Simulations. *Pure Appl. Chem.* **2004**, *76* (1), 231–240. <https://doi.org/10.1351/pac200476010231>.
- (2) Randhawa, P.; Gower-Fry, K. L.; Stienstra, C. M. K.; Tosato, M.; Chen, S.; Gao, Y.; McDonagh, A. W.; Di Marco, V.; Radchenko, V.; Schreckenbach, G.; Ramogida, C. F. Selective Chelation of the Exotic Meitner-Auger Emitter Mercury-197m/g with Sulfur-Rich Macrocyclic Ligands: Towards the Future of Theranostic Radiopharmaceuticals. *Chem. – Eur. J.* **2023**, *29* (21), e202203815. <https://doi.org/10.1002/chem.202203815>.
